# Supplementary material for: Variability of Prokaryotic Community Structure in a Drinking Water Reservoir (Marathonas, Greece)
Source: PubMed Central journal article supplement (PMC4036031; doi:10.1264/jsme2.me11253), 2011-10-05
Supplement: 27_1_s1.pdf [file 27_1_s1.pdf]

1  
2  
3

**SUPPLEMENTARY MATERIAL**

**Lymperopoulou *et al.*, submitted to “Microbes and Environments”**

4 **Table S1.** Occurrence of archaeal phylotypes in three water column stations (A, B, K) and the water collection tower of Marathonas Reservoir, Greece, on 30  
 5 October 2007 and 08 September 2008.

6

|             | <i>Clone</i> | <i>No. of similar<br/>(≥98%) clones</i> | <i>Putative<br/>affiliation</i> | <i>Closest sequence (similarity) [GenBank<br/>accession No.]</i> | <i>Description</i>                | <i>Closest organism (similarity)<br/>[GenBank accession No.]</i>                |
|-------------|--------------|-----------------------------------------|---------------------------------|------------------------------------------------------------------|-----------------------------------|---------------------------------------------------------------------------------|
| <b>2007</b> |              |                                         |                                 |                                                                  |                                   |                                                                                 |
| 1           | A07-01-ARC   | 11                                      | <i>Thaumarchaeota</i>           | Clone BI15J2 (99.64 %) [EU490315]                                | Lake Bourget – France             |                                                                                 |
| 2           | B07-01-ARC   | 9                                       | <i>Euryarchaeota</i>            | Clone s39t24arch30 (99.82 %) [FM957645]                          | Rice field soil                   |                                                                                 |
| 3           | K07-01-ARC   | 11                                      | <i>Thaumarchaeota</i>           | Clone BI15J2 (99.64 %) [EU490315]                                | Lake Bourget – France             |                                                                                 |
| 4           | K07-05-ARC   | 1                                       | <i>Euryarchaeota</i>            | Clone Hua4-s77 (98.90 %) [EU481582]                              | Saline wetland                    |                                                                                 |
| 5           | K07-06-ARC   | 2                                       | <i>Thaumarchaeota</i>           | Clone HTA-G6 (99.27 %) [AF418938]                                | Freshwater reservoir              |                                                                                 |
| 6           | K07-07-ARC   | 1                                       | <i>Thaumarchaeota</i>           | Clone SLG-332 (98.55 %) [EU365284]                               | Soil                              |                                                                                 |
| 7           | K07-10-ARC   | 1                                       | <i>Euryarchaeota</i>            | Clone sl3182 (99.82 %) [EU244212]                                | River Leine sediment              |                                                                                 |
| 8           | VE07-01-ARC  | 5                                       | <i>Thaumarchaeota</i>           | Clone ARC_10SAF2-28 (97.60 %) [DQ782347]                         | NASA spacecraft assembly facility |                                                                                 |
| 9           | VE07-03-ARC  | 1                                       | <i>Euryarchaeota</i>            | Clone MH1492_4E (99.46 %) [EU155950]                             | Rich minerotrophic fen            |                                                                                 |
| 10          | VE07-04-ARC  | 5                                       | <i>Euryarchaeota</i>            | Clone NA5AR52 (99.46 %) [FM957993]                               | Rice paddy soil                   | <i>Methanosarcina</i> sp. 48 (99.28 %) [EF112192]                               |
| 11          | VE07-05-ARC  | 1                                       | <i>Thaumarchaeota</i>           | Clone LR-305 (99.45 %) [DQ302464]                                | Lonar soda lake (India)           |                                                                                 |
| 12          | VE07-06-ARC  | 1                                       | <i>Euryarchaeota</i>            | Clone QEED1BH111 (93.31 %) [CU916385]                            | Wastewater sludge                 | <i>Methanospirillum hungatei</i> (89.80%) [AB517987]                            |
| 13          | VE07-07-ARC  | 2                                       | <i>Thaumarchaeota</i>           | Clone BuhD-Ar111 (98.91 %) [FM897353]                            | Uranium mill tailings             | <i>Candidatus Nitrososphaera gargensis</i> clone RHGA92E13c (96.02%) [EU281335] |
| 14          | VE07-09-ARC  | 1                                       | <i>Thaumarchaeota</i>           | Clone sscpArc_V5A5 (99.64 %) [FM179191]                          | Groundwater                       |                                                                                 |
| 15          | VE07-10-ARC  | 1                                       | <i>Euryarchaeota</i>            | Clone LL_Koral_24 (98.55 %) [AM503239]                           | Roots of rice                     | <i>Methanospirillum hungatei</i> (95.83 %) [AY196683]                           |
| <b>2008</b> |              |                                         |                                 |                                                                  |                                   |                                                                                 |
| 16          | A08-22-ARC   | 5                                       | <i>Euryarchaeota</i>            | Clone NA5AR52 (99.46 %) [FM957993]                               | Soil                              | <i>Methanosarcina</i> sp. 48 (99.28 %) [EF112192]                               |
| 17          | A08-25-ARC   | 5                                       | <i>Euryarchaeota</i>            | Clone G19 (99.46 %) [EU910626]                                   | Lake Huron (USA)-sediment         |                                                                                 |
| 18          | A08-26-ARC   | 2                                       | <i>Crenarchaeota</i>            | Clone MH1492_B2C (98.91 %) [EU155996]                            | Rich minerotrophic fen            |                                                                                 |
| 19          | A08-27-ARC   | 1                                       | <i>Thaumarchaeota</i>           | Clone NG-W-080829_2-8 (99.28 %) [AB550807]                       | River water                       |                                                                                 |

|    |             |   |                       |                                             |                       |                                                                           |
|----|-------------|---|-----------------------|---------------------------------------------|-----------------------|---------------------------------------------------------------------------|
| 20 | A08-30-ARC  | 2 | <i>Euryarchaeota</i>  | Clone MD2902-A47 (94.43 %) [EU385840]       | Subseafloor sediments |                                                                           |
| 21 | A08-31-ARC  | 1 | <i>Crenarchaeota</i>  | Clone LL_ADT_46 (98.73 %) [AM503301]        | Rice roots            |                                                                           |
| 22 | A08-32-ARC  | 1 | <i>Euryarchaeota</i>  | Clone NG-W-080829_2-3 (96.28 %) [AB550818]  | Rice roots            |                                                                           |
| 23 | B08-21-ARC  | 2 | <i>Euryarchaeota</i>  | Clone N4-E2 (96.74 %) [FN691626]            | Lake                  | <i>Methanobacterium uliginosum</i><br>NBRC 105232<br>(79.93 %) [AB542914] |
| 24 | B08-27-ARC  | 3 | <i>Euryarchaeota</i>  | Clone N4-E2 (93.50 %) [FN691626]            | Lake                  | <i>Methanobacterium uliginosum</i><br>NBRC 105232<br>(76.23 %) [AB542914] |
| 25 | B08-33-ARC  | 3 | <i>Thaumarchaeota</i> | Clone ZZ-50 (94.11 %) [HM051131]            | Soil                  |                                                                           |
| 26 | B08-34-ARC  | 3 | <i>Euryarchaeota</i>  | Clone s39t24arch30 (99.82 %) [FM957645]     | Rice field soil       |                                                                           |
| 27 | K08-26-ARC  | 1 | <i>Crenarchaeota</i>  | Clone 2PZ28.1 (98.92 %) [FJ957963]          | Wetland               |                                                                           |
| 28 | K08-30-ARC  | 5 | <i>Euryarchaeota</i>  | Clone NA5AR52 (99.46 %) [FM957993]          | Soil                  | <i>Methanosarcina</i> sp. 48<br>(99.28 %) [EF112192]                      |
| 29 | K08-34-ARC  | 1 | <i>Thaumarchaeota</i> | Clone CaR3s.19 (93.71 %) [EF014505]         | Lake                  |                                                                           |
| 30 | K08-38-ARC  | 2 | <i>Thaumarchaeota</i> | Clone NG-W-080829_2-8 (99.09 %) [AB550807]  |                       |                                                                           |
| 31 | K08-39-ARC  | 1 | <i>Euryarchaeota</i>  | Clone IU-FSC-4_Ar-A011 (98.20 %) [AB380041] | Soil                  |                                                                           |
| 32 | VE08-23-ARC | 2 | <i>Euryarchaeota</i>  | Clone NO-24 (98.38 %) [GQ906627]            | River                 |                                                                           |
| 33 | VE08-25-ARC | 3 | <i>Euryarchaeota</i>  | Clone RF_ADT_40 (99.09 %) [AM503211]        | Riverbank soil        |                                                                           |
| 34 | VE08-26-ARC | 2 | <i>Euryarchaeota</i>  | Clone YBSAr06 (99.27 %) [FM165684]          | Rice paddy soil       | <i>Candidatus Methanoregula boonei</i> SN19<br>(97.64 %) [EU887826]       |
| 35 | VE08-30-ARC | 2 | <i>Euryarchaeota</i>  | Clone 20c-52 (94.55 %) [AJ299201]           | Aegean sea sediments  |                                                                           |
| 36 | VE08-36-ARC | 3 | <i>Euryarchaeota</i>  | Clone rDu915-G2 (99.28 %) [FJ822564]        | Acidic bog            | <i>Methanosarcina</i> sp.<br>HC-2<br>(98.92 %) [AB288264]                 |
| 37 | VE08-40-ARC | 2 | <i>Euryarchaeota</i>  | Clone Mat-ARC-19 (98.26 %) [EU255755]       | Freshwater            |                                                                           |

8 **Table S2.** Occurrence of bacterial phylotypes in three water column stations (A, B, K) and the water collection tower of Marathonas Reservoir, Greece, on 30  
 9 October 2007 and 08 September 2008.

10

|             | <i>Clone</i> | <i>No. of similar<br/>(≥98%) clones</i> | <i>Putative<br/>affiliation</i> | <i>Closest sequence<br/>(similarity)<br/>[GenBank accession No.]</i> | <i>Description</i>                              | <i>Closest organism<br/>(similarity)<br/>[GenBank accession No.]</i>                    |
|-------------|--------------|-----------------------------------------|---------------------------------|----------------------------------------------------------------------|-------------------------------------------------|-----------------------------------------------------------------------------------------|
| <b>2007</b> |              |                                         |                                 |                                                                      |                                                 |                                                                                         |
| 38          | A07-02       | 1                                       | <i>Betaproteobacteria</i>       | Clone DP3.2.7<br>(99.57%) [FJ612136]                                 | Dongping Lake water<br>(China)                  | <i>Polynucleobacter<br/>cosmopolitanus</i> KF027<br>(99.64%) [AB269813]                 |
| 39          | A07-06       | 1                                       | <i>Bacteroidetes</i>            | <i>Sphingobacterium</i> sp. clone ZS-4-66<br>(96.94%) [FN668098]     | Lake Zurich                                     | <i>Sediminibacterium</i> sp.<br>TEGAF015<br>(92.23%) [AB470450]                         |
| 40          | A07-09       | 2                                       | <i>Unaffiliated</i>             | Clone YHY15<br>(98.83%) [GU305800]                                   | YangHe reservoir/MinYun<br>reservoir            |                                                                                         |
| 41          | A07-12       | 1                                       | <i>Alphaproteobacteria</i>      | Clone D44 35<br>(99.78%) [EU580491]                                  | Lake Contance                                   | <i>Sphingomonas</i> sp. B18<br>(99.63%) [AF410927]                                      |
| 42          | A07-13       | 1                                       | <i>Unaffiliated</i>             | Crater Lake Clone CL500-48<br>(99.49%) [AF316757]                    | Oligotrophic Crater Lake<br>water               |                                                                                         |
| 43          | A07-14       | 6                                       | <i>Alphaproteobacteria</i>      | Clone DP10.4.4<br>(99.70%) [FJ612398]                                | Lake water                                      |                                                                                         |
| 44          | A07-16       | 1                                       | <i>Bacteroidetes</i>            | Clone Foos8B_57<br>(94.89%) [EU431801]                               | Calcium carbonate muds at<br>percolating waters | <i>Tuber borchii</i> symbiont b-<br>17BO<br>(89.86%) [AF070444]                         |
| 45          | A07-21       | 1                                       | <i>Actinobacteria</i>           | Actinobacterium clone TR1E4<br>(99.71%) [EU117953]                   | Freshwater                                      | <i>Candidatus Planktophila<br/>limnetica</i><br>MWH-EgelM2-3.acI<br>(97.82%) [FJ428831] |
| 46          | A07-22       | 1                                       | <i>Alphaproteobacteria</i>      | Clone tIs2-10<br>(99.08%) [DQ463198]                                 | Acid Mine Drainage                              | <i>Novosphingobium<br/>pentaromativorans</i> 16-21<br>(95.19%) [EU167952]               |
| 47          | A07-23       | 3                                       | <i>Bacteroidetes</i>            | Bacteroidetes clone PRD18D09<br>(99.56%) [AY948029]                  | Temperate River                                 |                                                                                         |
| 48          | A07-25       | 1                                       | <i>Actinobacteria</i>           | Clone MYS16<br>(98.50%) [GU305737]                                   | YangHe reservoir/MinYun<br>reservoir            |                                                                                         |

|    |        |   |                           |                                                                |                                                     |                                                                         |
|----|--------|---|---------------------------|----------------------------------------------------------------|-----------------------------------------------------|-------------------------------------------------------------------------|
| 49 | A07-32 | 7 | <i>Actinobacteria</i>     | Clone MYS14<br>(99.85 %) [GU305708]                            | YangHe reservoir/MinYun reservoir                   |                                                                         |
| 50 | A07-33 | 1 | <i>Betaproteobacteria</i> | Clone ML-5-90.2<br>(99.86 %) [DQ520167]                        | Shallow hypertrophic freshwater lake (China)        | <i>Variovorax</i> sp. EMB 263<br>(97.89 %) [DQ413166]                   |
| 51 | A07-39 | 1 | <i>Betaproteobacteria</i> | Betaproteobacterium clone ADK-CSe02-53<br>(99.93 %) [EF520468] | Acid Impacted Lake                                  |                                                                         |
| 52 | A07-40 | 1 | <i>Verrucomicrobia</i>    | Clone SINO895<br>(97.18 %) [HM129970]                          | Tibetan Lake (China)                                | <i>Luteolibacter algae</i><br>A5J-40<br>(96,92 %) [AB331894]            |
| 53 | A07-41 | 1 | <i>Verrucomicrobia</i>    | Clone MYW29<br>(98.65 %) [GU305773]                            | YangHe reservoir/MinYun reservoir                   | <i>Methylacidiphilum inferorum</i> V4 CP000975<br>(83.68 %) [CP000975 ] |
| 54 | A07-42 | 2 | <i>Acidobacteria</i>      | Clone UG7<br>(97.87 %) [DQ298003]                              | H/C contaminated soil                               | <i>Solibacter usitatus</i><br>Ellin6076<br>(93.53 %) [CP000473]         |
| 55 | A07-43 | 2 | <i>Actinobacteria</i>     | Actinobacterium clone TW1C9<br>(99.85 %) [EU117978]            | Freshwater                                          |                                                                         |
| 56 | A07-44 | 1 | <i>Acidobacteria</i>      | Clone Elev_16S_1240<br>(98.44 %) [EF019878]                    | Rhizosphere                                         | <i>Solibacter usitatus</i><br>Ellin6076<br>(92.20 %) [CP000473]         |
| 57 | A07-46 | 1 | <i>Betaproteobacteria</i> | Clone 3C003438<br>(99.64 %) [EU802045]                         | Chesapeake Bay, MD (USA)                            | <i>Comamonadaceae</i><br>bacterium BP-1b<br>(97.17 %) [AY145570]        |
| 58 | A07-54 | 1 | <i>Chloroflexi</i>        | Clone 35-7<br>(99.34 %) [DQ833481]                             | Sediment                                            |                                                                         |
| 59 | A07-55 | 1 | <i>Bacteroidetes</i>      | Clone YHW4<br>(97.92 %) [GU305829]                             |                                                     |                                                                         |
| 60 | A07-57 | 1 | <i>Actinobacteria</i>     | <i>Nocardia</i> sp. TFS 668<br>(98,98 %) [EF216351]            | Sediment                                            |                                                                         |
| 61 | A07-60 | 1 | <i>Bacteroidetes</i>      | Clone B21.11<br>(99.85 %) [GU559811]                           | Anaerobic fermentation of <i>Microcystis</i> blooms |                                                                         |
| 62 | A07-62 | 4 | <i>Cyanobacteria</i>      | <i>Microcystis aeruginosa</i> 0BB35S02 (99.48 %)<br>[AJ635430] | Basin of Bubano, Imola, Italy                       |                                                                         |
| 63 | A07-63 | 1 | <i>Bacteroidetes</i>      | Clone PW25.9B<br>(99.71 %) [EU573114]                          | Oil reservoir                                       | <i>Flavobacterium</i> sp.<br>WB3.4-82                                   |

|    |        |   |                            |                                                                                                                            |                                                      |                                                                               |
|----|--------|---|----------------------------|----------------------------------------------------------------------------------------------------------------------------|------------------------------------------------------|-------------------------------------------------------------------------------|
| 64 | A07-64 | 4 | <i>Bacteroidetes</i>       | <i>Sphingobacteriales</i> clone SF68 (99.35 %) [AJ697704]                                                                  | Mesotrophic Lake                                     | (99.85 %) [AM934665]<br><i>Chimaericella</i> sp. A8-7<br>(97.28 %) [EU313811] |
| 65 | A07-65 | 4 | <i>Actinobacteria</i>      | Clone MYW3 (99.85 %) [GU305754]                                                                                            | YangHe reservoir/MinYun reservoir                    |                                                                               |
| 66 | A07-66 | 1 | <i>Betaproteobacteria</i>  | Clone 117ds10 (95.70 %) [AY212568]                                                                                         | Equine Feecal Contamination                          | <i>Aquamonas mexican</i> AQ11<br>(94.27 %) [AB120965]                         |
| 67 | A07-68 | 1 | <i>Alphaproteobacteria</i> | Clone 5C230894 (98.66 %) [EU803336]                                                                                        | Lake Gatun, Panama                                   | <i>Roseomonas</i> sp. SK 65<br>(96.21 %) [AM991117]                           |
| 68 | A07-70 | 2 | <i>Bacteroidetes</i>       | Clone nbw992e03c1 (98.74 %) [GQ045991]                                                                                     | Human Skin Microbiome                                | <i>Tuber borchii</i> symbiont b-17BO<br>(95.11 %) [AF070444]                  |
| 69 | A07-73 | 4 | <i>Gammaproteobacteria</i> | Clone MC1_16S_55 (98.99 %) [EU662624]                                                                                      | Sulfidic water (Movile Cave, Romania)                | <i>Rheinheimera chironomi</i> K19414<br>(97.70 %) [DQ298025]                  |
| 70 | A07-76 | 2 | <i>Verrucomicrobia</i>     | Clone MYW38 (99.57 %) [GU305779]                                                                                           | MiYu reservoir water                                 | <i>Lentimonas marisflavi</i> IMCC2112<br>(84.98 %) [EF157839]                 |
| 71 | A07-77 | 2 | <i>Alphaproteobacteria</i> | Alphaproteobacterium clone ZS-2-22 (99.55 %) [FN668055]                                                                    | Lake Zurich                                          | <i>Rhodobacter</i> sp. Jip03<br>(97.17 %) [AB122032]                          |
| 72 | A07-78 | 4 | <i>Betaproteobacteria</i>  | <i>Curvibacter</i> putative symbiont of <i>Hydra magnipapillata</i> genomic scaffold HmaUn_WGA71069_1 (99.71 %) [FN543107] | Symbiont of <i>Hydra magnipapillata</i>              | <i>Aquamonas mexican</i> AQ11<br>(98.42 %) [AB120965]                         |
| 73 | A07-79 | 3 | <i>Actinobacteria</i>      | Clone MYS13 (100.00 %) [GU305736]                                                                                          | MiYu reservoir water                                 |                                                                               |
| 74 | A07-82 | 1 | <i>Alphaproteobacteria</i> | Alphaproteobacterium HIBAF003 (99.92 %) [AB452982]                                                                         | Freshwater Bacterioplankton                          | <i>Brevundimonas</i> sp. DR12<br>(99.24 %) [FJ447545]                         |
| 75 | A07-84 | 1 | <i>Alphaproteobacteria</i> | Clone A9_10.4_2 (99.39 %) [FJ716899]                                                                                       | Marine sediment from Cullercoats, Northumberland, UK | <i>Agrobacterium</i> sp. P128<br>(99.39 %) [EU195949]                         |
| 76 | A07-87 | 1 | <i>Actinobacteria</i>      | Clone SINI1012 (96.56 %) [HM126680]                                                                                        | Tibetan Lake (China)                                 | <i>Actinomycetales</i> bacterium GSoil 1621<br>(90.08 %) [AB245400]           |
| 77 | A07-88 | 1 | <i>Bacteroidetes</i>       | Clone 2C229017 (99.35 %) [EU800805]                                                                                        | Delaware Bay, NJ (USA)                               | <i>Fluviicola taffensis</i> RW262<br>(92.88 %) [AF493694]                     |
| 78 | A07-90 | 1 | <i>Bacteroidetes</i>       | Clone CV24 (95.92 %) [DQ499283]                                                                                            | Cave system biofilm                                  | <i>Tuber borchii</i> symbiont b-17BO                                          |

|    |        |   |                            |                                                                  |                                              |                                                                                   |
|----|--------|---|----------------------------|------------------------------------------------------------------|----------------------------------------------|-----------------------------------------------------------------------------------|
| 79 | A07-91 | 2 | <i>Bacteroidetes</i>       | Clone FFCH3806<br>(97.92 %) [EU133760]                           | Soil                                         | (90.03 %) [AF070444]<br><i>Fluviicola taffensis</i> RW262<br>(94.23 %) [AF493694] |
| 80 | A07-92 | 2 | <i>Bacteroidetes</i>       | Clone SING780<br>(99.42 %) [HM129373]                            | Tibetan Lake (China)                         |                                                                                   |
| 81 | A07-95 | 3 | <i>Betaproteobacteria</i>  | Clone DP10.3.1<br>(99.71 %) [FJ612363]                           | Dongping Lake<br>Ecosystems (China)          | <i>Curvibacter gracilis</i><br>(97.78 %) [AB109889]                               |
| 82 | A07-97 | 4 | <i>Bacteroidetes</i>       | <i>Flexibacter</i> sp.<br>clone ZS-1-345<br>(99.71 %) [FN668151] | Lake Zurich                                  |                                                                                   |
| 83 | B07-03 | 2 | <i>Verrucomicrobia</i>     | Verrucomicrobia clone QEEB2AB02<br>(90.61 %) [CU917669]          | Sludge                                       |                                                                                   |
| 84 | B07-05 | 1 | <i>Actinobacteria</i>      | Actinobacterium clone ADK-Moh02-65<br>(96.24 %) [EF520362]       | Acid impacted lake                           | <i>Cellulomonas</i> sp. F11<br>(90.98 %) [EU697083]                               |
| 85 | B07-10 | 1 | <i>Alphaproteobacteria</i> | Clone 3C002503<br>(99.63 %) [EU801252]                           | Chesapeake Bay, MD<br>(USA)                  | Rhizobiales bacterium<br>Mfc52<br>(94.48 %) [AB365487]                            |
| 86 | B07-19 | 1 | <i>Actinobacteria</i>      | Clone YHW22<br>(99.64 %) [GU305846]                              | YangHe reservoir/MinYun<br>reservoir (China) |                                                                                   |
| 87 | B07-22 | 1 | <i>Bacteroidetes</i>       | Clone K2-30-6<br>(95.14 %) [AY344418]                            | Hawaiian archipelago                         |                                                                                   |
| 88 | B07-23 | 4 | <i>Verrucomicrobia</i>     | Clone MYW38<br>(99.86 %) [GU305779]                              | YangHe reservoir/MinYun<br>reservoir         | <i>Lentimonas marisflavi</i><br>IMCC2112<br>(84.98 %) [EF157839]                  |
| 89 | B07-24 | 2 | <i>Bacteroidetes</i>       | Clone DP10.2.20<br>(99.64 %) [FJ612348]                          | Dongping Lake<br>Ecosystems (China)          | <i>Arcicella</i> sp. MG83<br>(93.21 %) [AJ746140]                                 |
| 90 | B07-26 | 1 | <i>Actinobacteria</i>      | <i>Nocardia</i> sp. TFS 359<br>(99.06 %) [EF216366]              | Sediment (Trondheim<br>fjord)                |                                                                                   |
| 91 | B07-29 | 2 | <i>Actinobacteria</i>      | Clone 2C229335<br>(99.27 %) [EU801038]                           | Delaware Bay, NJ, USA                        |                                                                                   |
| 92 | B07-30 | 4 | <i>Bacteroidetes</i>       | Clone DP10.4.3<br>(99.71 %) [FJ612397]                           | Dongping Lake<br>Ecosystems                  |                                                                                   |
| 93 | B07-31 | 1 | <i>Gammaproteobacteria</i> | <i>Rheinheimera taxanensis</i> TSWCW<br>(98.41 %) [GQ284452]     | Ghats (India)                                |                                                                                   |
| 94 | B07-32 | 1 | <i>Betaproteobacteria</i>  | Clone 2C229239<br>(99.93 %) [EU800970]                           | Delaware Bay, NJ, USA                        |                                                                                   |
| 95 | B07-33 | 4 | <i>Alphaproteobacteria</i> | Clone DP10.4.4<br>(99.85 %) [FJ612398]                           | Dongping Lake<br>Ecosystems                  |                                                                                   |

|     |         |   |                            |                                                            |                                      |                                                                                                 |
|-----|---------|---|----------------------------|------------------------------------------------------------|--------------------------------------|-------------------------------------------------------------------------------------------------|
| 96  | B07-34  | 1 | <i>Betaproteobacteria</i>  | Clone DP10.4.32<br>(99.64 %) [FJ612414]                    | Dongping Lake<br>Ecosystems          |                                                                                                 |
| 97  | B07-37  | 2 | <i>Betaproteobacteria</i>  | Clone 3C003438<br>(99.42 %) [EU802045]                     | Chesapeake Bay, MD,<br>USA           | <i>Comamonadaceae</i><br>bacterium BP-1b<br>(97.17 %) [AY145570]                                |
| 98  | B07-38  | 2 | <i>Actinobacteria</i>      | Actinobacterium clone LA1C1<br>(99.85 %) [EU117788]        | Freshwater                           | <i>Candidatus Planktophilia</i><br><i>limnetica</i><br>MWH-EgelM2-3.acI<br>(97.96 %) [FJ428831] |
| 99  | B07-39  | 1 | <i>Cyanobacteria</i>       | Clone DP7.1.5<br>(98.13 %) [FJ612231]                      | Dongping Lake<br>Ecosystems          | <i>Coscinodiscus radiatus</i> -<br>chloroplast p148<br>(88.41 %) [AJ536462]                     |
| 100 | B07-41  | 2 | <i>Cyanobacteria</i>       | <i>Limnococcus limneticus</i> Svet06<br>(99.77%)[GQ375048] | Eutrophic freshwater<br>fishpond     | <i>Gloeocapsa</i> sp. PCC 73106<br>(94.56 %) [AF132784]                                         |
| 101 | B07-44  | 1 | <i>Actinobacteria</i>      | Actinobacterium clone Eub62A911<br>(98.16 %) [GQ390232]    | Lake Pavin                           | <i>Sporichthya polymorpha</i><br>(91.99 %) [X72377]                                             |
| 102 | B07-46  | 2 | <i>Actinobacteria</i>      | Clone 3C002646<br>(99.85 %) [EU801375]                     | Chesapeake Bay, MD, USA              |                                                                                                 |
| 103 | B07-49  | 1 | <i>Alphaproteobacteria</i> | Clone D44 35<br>(99.63 %) [EU580491]                       | Lake Constance                       | <i>Sphingomonas</i> sp. B18<br>(99.63 %) [AF410927]                                             |
| 104 | B07-50  | 1 | <i>Chloroflexi</i>         | Clone HTH4<br>(98.72 %) [AF418964]                         | Freshwater Reservoir                 | <i>Kouleothrix aurantiaca</i><br>MYSI-A<br>(86.28 %) [AB079639]                                 |
| 105 | B07-52  | 3 | <i>Betaproteobacteria</i>  | Clone 3C003467<br>(99.21 %) [EU802072]                     | Chesapeake Bay, MD,<br>USA           | <i>Rhodoferrax</i> sp. Asd M2A1<br>(98.28 %) [FM955857]                                         |
| 106 | B07-53  | 1 | <i>Gammaproteobacteria</i> | <i>Pseudomonas</i> sp. CJ11064<br>(99.50 %) [AF500211]     |                                      |                                                                                                 |
| 107 | B07-57  | 7 | <i>Actinobacteria</i>      | Clone MYW3<br>(99.71 %) [GU305754]                         | YangHe reservoir/MinYun<br>reservoir |                                                                                                 |
| 108 | B07-59  | 3 | <i>Bacteroidetes</i>       | Clone 2C229017<br>(99.35 %) [EU800805]                     | Delaware Bay, NJ, USA                | <i>Fluviicola taffensis</i> RW262<br>(92.88 %) [AF493694]                                       |
| 109 | B07- 61 | 4 | <i>Actinobacteria</i>      | Clone MYS21<br>(99.93 %) [GU305741]                        | YangHe reservoir/MinYun<br>reservoir |                                                                                                 |
| 110 | B07-63  | 1 | <i>Planctomycetes</i>      | Clone DP10.2.53<br>(94.45 %) [FJ612357]                    | Dongping Lake<br>Ecosystems          | <i>Planctomycete</i> GMD16E07<br>(82%) [AY162118]                                               |
| 111 | B07-64  | 1 | <i>Chloroflexi</i>         | Clone MYS10                                                | YangHe reservoir/MinYun              |                                                                                                 |



|     |        |    |                            |                                                               |                                                            |                                                                          |
|-----|--------|----|----------------------------|---------------------------------------------------------------|------------------------------------------------------------|--------------------------------------------------------------------------|
| 112 | B07-65 | 1  | <i>Betaproteobacteria</i>  | (99.78 %) [GU305734]<br>Clone DP3.2.7<br>(99.57 %) [FJ612136] | reservoir<br>Dongping Lake<br>Ecosystems                   | <i>Polynucleobacter<br/>cosmopolitanus</i> KF027<br>(99.64 %) [AB269813] |
| 113 | B07-66 | 1  | <i>Alphaproteobacteria</i> | Alphaproteobacterium clone ZS-2-22<br>(99.62 %) [FN668055]    | Lake Zurich                                                | <i>Rhodobacter</i> sp. Jip03<br>(97.25 %) [AB122032]                     |
| 114 | B07-68 | 10 | <i>Actinobacteria</i>      | Clone MYY14<br>(99.85 %) [GU305708]                           | YangHe reservoir/MinYun<br>reservoir                       |                                                                          |
| 115 | B07-69 | 1  | <i>Bacteroidetes</i>       | Clone 3C003104<br>(98.99 %) [EU801740]                        | Chesapeake Bay, MD,<br>USA                                 | <i>Flavobacterium</i> sp.<br>INBF006<br>(98.47 %) [AB426577]             |
| 116 | B07-70 | 1  | <i>Actinobacteria</i>      | Clone ML-7-114.2<br>(96.33 %) [DQ520182]                      | Shallow hypertrophic lake                                  |                                                                          |
| 117 | B07-71 | 2  | <i>Verrucomicrobia</i>     | Clone NMG8<br>(91.19 %) [GU183621]                            | Aquifer                                                    |                                                                          |
| 118 | B07-82 | 1  | <i>Alphaproteobacteria</i> | <i>Afipia broomeae</i> F186<br>(99.93 %) [U87759]             |                                                            |                                                                          |
| 119 | B07-85 | 1  | <i>Bacteroidetes</i>       | <i>Flexibacter</i> sp. clone ZS-4-376<br>(95.43 %) [FN668199] | Lake Zurich                                                | <i>Fluviicola taffensis</i> RW262<br>(93.37 %) [AF493694]                |
| 120 | B07-88 | 2  | <i>Cyanobacteria</i>       | Clone DP3.2.22<br>(99.63 %) [FJ612143]                        | Dongping Lake<br>Ecosystems                                | <i>Thalassiosira pseudonana</i> -<br>chloroplast<br>(99.03 %) [EF067921] |
| 121 | B07-89 | 1  | <i>Planctomycetes</i>      | Clone K0029<br>(97.11 %) [FJ820433]                           | Wuliangshuai Lake<br>(China)                               |                                                                          |
| 122 | B07-90 | 2  | <i>Alphaproteobacteria</i> | Clone A9_10.4_2<br>(99.17 %) [FJ716899]                       | Marine sediment from<br>Cullercoats,<br>Northumberland, UK | <i>Agrobacterium</i> sp. P128<br>(99.16 %) [EU195949]                    |
| 123 | B07-93 | 1  | <i>Acidobacteria</i>       | Acidobacterium clone ZS-4-79<br>(99.57 %) [FN668206]          | Lake Zurich                                                | <i>H. foetida</i> TMBS4-T (DSM<br>6591-T)<br>(91.44 %) [X77215]          |
| 124 | B07-94 | 1  | <i>Bacteroidetes</i>       | Clone MYY7<br>(95.51 %) [GU305702]                            | YangHe reservoir/MinYun<br>reservoir                       |                                                                          |
| 125 | K07-02 | 1  | <i>Alphaproteobacteria</i> | Rhodospirillaceae bacterium Dia-1<br>(99.08 %) [EU678309]     | Lake Constance                                             | <i>Azospirillum</i> sp. Mat2-1a<br>(91.45 %) [AY118222]                  |
| 126 | K07-03 | 2  | <i>Actinobacteria</i>      | Actinobacterium clone ME7A10<br>(99.78 %) [EU117760]          | Lake epilimnion                                            |                                                                          |
| 127 | K07-04 | 2  | <i>Betaproteobacteria</i>  | Betaproteobacterium clone MI1G10                              | Temperate river                                            | <i>Comamonadaceae</i>                                                    |

|     |        |   |                            |                                                                |                                      |                                                                                 |
|-----|--------|---|----------------------------|----------------------------------------------------------------|--------------------------------------|---------------------------------------------------------------------------------|
|     |        |   |                            | (99.93 %) [FJ916099]                                           |                                      | bacterium BP-1b<br>(97.46 %) [AY145570]                                         |
| 128 | K07-05 | 1 | <i>Bacteroidetes</i>       | <i>Fluviicola</i> sp. clone XZELH61<br>(99.86 %) [EU703159]    | Lake bacterioplankton                | <i>Fluviicola taffensis</i> RW262<br>(91.08 %) [AF493694]                       |
| 129 | K07-06 | 1 | <i>Verrucomicrobia</i>     | Clone MYW29<br>(99.43 %) [GU305773]                            | YangHe reservoir/MinYun<br>reservoir | <i>Methylacidiphilum<br/>fumariolicum</i> SolV<br>(84.49 %) [EF591088]          |
| 130 | K07-07 | 1 | <i>Betaproteobacteria</i>  | Betaproteobacterium clone QEEB2DE10<br>(97.42 %) [CU917998]    | Sludge                               | <i>Derxia gummosa</i><br>IAM13946<br>(95.12 %) [AB089482]                       |
| 131 | K07-10 | 1 | <i>Cyanobacteria</i>       | <i>Microcystis aeruginosa</i> 0BB35S02 (99.63 %)<br>[AJ635430] | Basin of Bubano, Imola,<br>Italy     |                                                                                 |
| 132 | K07-11 | 1 | <i>Actinobacteria</i>      | Actinobacterium clone LT1B7<br>(99.85 %) [EU117819]            | Freshwater                           |                                                                                 |
| 133 | K07-13 | 1 | <i>Cyanobacteria</i>       | Clone DP7.1.5<br>(94.67 %) [FJ612231]                          | Dingpong Lake<br>Ecosystems          |                                                                                 |
| 134 | K07-14 | 1 | <i>Cyanobacteria</i>       | Clone DP3.2.22<br>(97.56 %) [FJ612143]                         | Dongping Lake<br>Ecosystems          | <i>Thalassiosira pseudonana</i> -<br>chloroplast<br>(96.97 %) [EF067921]        |
| 135 | K07-18 | 1 | <i>Actinobacteria</i>      | Clone SINN551<br>(96.92 %) [HM128624]                          | Tibetan Lake (China)                 | <i>Candidatus Planktoluna<br/>difficilis</i> MWH-7Well8<br>(95.60 %) [AM939566] |
| 136 | K07-20 | 1 | <i>Alphaproteobacteria</i> | Clone DP10.4.4<br>(98.07%) [FJ612398]                          | Dongping Lake<br>Ecosystems          |                                                                                 |
| 137 | K07-21 | 1 | <i>Betaproteobacteria</i>  | Clone Hot Creek 29<br>(98.56 %) [AY168738]                     | Biofilm                              | <i>Leptothrix</i> sp. S1.1<br>(98.49 %) [DQ241397]                              |
| 138 | K07-22 | 2 | <i>Unaffiliated</i>        | Crater Lake clone CL500-48<br>(99.41 %) [AF316757]             | Oligotrophic Crater Lake<br>water    |                                                                                 |
| 139 | K07-23 | 5 | <i>Actinobacteria</i>      | Clone MYS21<br>(99.93%) [GU305741]                             | YangHe reservoir/MinYun<br>reservoir |                                                                                 |
| 140 | K07-26 | 3 | <i>Actinobacteria</i>      | Actinobacterium clone ZS-2-02<br>(99.64 %) [FN668289]          | Lake Zurich                          |                                                                                 |
| 141 | K07-34 | 1 | <i>Bacteroidetes</i>       | Sphingobacteriales Clone SF68<br>(99.28 %) [AJ697704]          | Mesotrophic lake                     | <i>Algoriphagus aquatilis</i> A8-7<br>(97.21 %) [EU313811]                      |
| 142 | K07-35 | 1 | <i>Cyanobacteria</i>       | Clone DP3.2.22<br>(99.26 %) [FJ612143]                         | Dongping Lake<br>Ecosystems          | <i>Thalassiosira pseudonana</i> -<br>chloroplast<br>(98%) [EF067921]            |
| 143 | K07-36 | 1 | <i>Planctomycetes</i>      | Clone DP10.2.53                                                | Dongping Lake                        | <i>Planctomycete</i> GMD16E07                                                   |

|     |        |   |                            |                                                                                                                                            |                                                                    |                                                                |
|-----|--------|---|----------------------------|--------------------------------------------------------------------------------------------------------------------------------------------|--------------------------------------------------------------------|----------------------------------------------------------------|
|     |        |   |                            | (94.23 %) [FJ612357]                                                                                                                       | Ecosystems                                                         | (82%) [AY162118]                                               |
| 144 | K07-38 | 1 | <i>Betaproteobacteria</i>  | Clone 2C228142<br>(99.71 %) [EU800149]                                                                                                     | Delaware Bay, NJ, USA                                              | <i>Bordetella avium</i> 197N<br>(96.83 %) [AM167904]           |
| 145 | K07-40 | 1 | <i>Alphaproteobacteria</i> | Clone M3B31<br>(98.56 %) [FJ439862]                                                                                                        | Estrogen-degrading<br>membrane bioreactors                         | <i>Hirschia baltica</i><br>(90.87 %) [AJ421782]                |
| 146 | K07-42 | 1 | <i>Alphaproteobacteria</i> | <i>Sphingomonas</i> sp. A1-8<br>(99.93 %) [AY512600]                                                                                       | Industrial site                                                    |                                                                |
| 147 | K07-45 | 1 | <i>Planctomycetes</i>      | Clone FGL12_B49<br>(99.71 %) [FJ437884]                                                                                                    | Fayetteville Green Lake<br>water-NY                                | <i>Isophaera</i> sp.<br>(Schlesner 657)<br>(88.93 %) [X81960]  |
| 148 | K07-46 | 1 | <i>Alphaproteobacteria</i> | Alphaproteobacterium clone D2H08<br>(98.37 %) [EU753667]                                                                                   | Freshwater stromatolites<br>(Ruidera Pools National<br>Park-Spain) | <i>Erythrobacter</i> sp. JL993<br>(96.15 %)<br>[DQ985049]      |
| 149 | K07-48 | 1 | <i>Betaproteobacteria</i>  | Clone 42ds5<br>(97.77 %) [AY212737]                                                                                                        | Fecal contamination                                                | <i>Pelomonas saccharophila</i><br>H-Z9<br>(96.47 %) [AB495144] |
| 150 | K07-49 | 1 | <i>Firmicutes</i>          | <i>Bacillus</i> sp. SGE2<br>(92.90 %) [AY556409]                                                                                           |                                                                    |                                                                |
| 151 | K07-52 | 1 | <i>Gammaproteobacteria</i> | Clone DP3.2.13<br>(98.92 %) [FJ612139]                                                                                                     | Dongping Lake<br>Ecosystems                                        | <i>Rheinheimera</i> sp.<br>HMD2012<br>(98.49%) [GQ374921]      |
| 152 | K07-54 | 3 | <i>Betaproteobacteria</i>  | <i>Curvibacter</i> putative symbiont of <i>Hydra</i><br><i>magnipapillata</i> genomic scaffold<br>HmaUn_WGA71069_1<br>(99.64 %) [FN543107] | Symbiont of <i>Hydra</i><br><i>magnipapillata</i>                  | <i>Aquamonas fontana</i> AQ11<br>(98.28 %) [AB120965]          |
| 153 | K07-56 | 1 | <i>Actinobacteria</i>      | Actinobacterium clone TR1A10<br>(99.93 %) [EU117930]                                                                                       | Lake epilimnion                                                    |                                                                |
| 154 | K07-63 | 2 | <i>Betaproteobacteria</i>  | Clone b91<br>(98.13 %) [EU919798]                                                                                                          | Bacterioplankton                                                   | <i>Aquabacterium</i> sp. P-136<br>(97.57 %) [AM412127]         |
| 155 | K07-64 | 1 | <i>Betaproteobacteria</i>  | Clone DP10.4.32<br>(99.29 %) [FJ612414]                                                                                                    | Dongping Lake<br>Ecosystems                                        |                                                                |
| 156 | K07-73 | 1 | <i>Betaproteobacteria</i>  | Betaproteobacterium clone 10-90-ArvAB<br>(99.13%) [AB425059]                                                                               | Alvaneu / Arvadi spring                                            | <i>Hydrogenophaga</i> sp.<br>EMB 75<br>(98/68 %) [DQ413154]    |
| 157 | K07-75 | 1 | <i>Bacteroidetes</i>       | Sphingobacteria clone ADK-SGh02-93                                                                                                         | Acid impacted lake                                                 | <i>Tuber borchii</i> symbiont                                  |

|     |         |   |                            |                                                             |                             |                                                                                          |
|-----|---------|---|----------------------------|-------------------------------------------------------------|-----------------------------|------------------------------------------------------------------------------------------|
|     |         |   |                            | (92.17 %) [EF520603]                                        |                             | b-1BO<br>(87.88 %) [AF070444]                                                            |
| 158 | K07-79  | 7 | <i>Alphaproteobacteria</i> | Clone DP10.4.4<br>(99.78 %) [FJ612398]                      | Dongping Lake<br>Ecosystems |                                                                                          |
| 159 | K07-81  | 2 | <i>Alphaproteobacteria</i> | Clone D44 35<br>(99.70%) [EU580491]                         | Lake Constance              | <i>Sphingomonas</i> sp. B18<br>(99.85 %) [AF410927]                                      |
| 160 | K07-82  | 2 | <i>Betaproteobacteria</i>  | Betaproteobacterium clone ZS-2-04<br>(99.57 %) [FN668029]   | Lake Zurich                 | <i>Curvibacter gracilis</i><br>(97.49 %) [AB109889]                                      |
| 161 | K07-84  | 1 | <i>Actinobacteria</i>      | Clone SINN551<br>(99.27 %) [HM128624]                       | Tibetan Lake (China)        | <i>Candidatus Planktoluna<br/>difficilis</i> MWH-7Well8<br>(97.83 %) [AM939566]          |
| 162 | K07-85  | 1 | <i>Actinobacteria</i>      | Actinobacterium clone LA1C3<br>(99.56 %) [FJ916093]         | Temperate lakes             | <i>Actinomycetales</i> bacterium<br>GP-5<br>(90.49 %) [AY145533]                         |
| 163 | K07-87  | 2 | <i>Actinobacteria</i>      | Actinobacterium clone TW1C9 (99,85 %)<br>[EU117978]         | Freshwater                  |                                                                                          |
| 164 | K07-90  | 1 | <i>Gammaproteobacteria</i> | <i>Pseudomonas</i> sp. CJ11064<br>(99.43 %) [AF500211]      |                             |                                                                                          |
| 165 | K07-91  | 1 | <i>Actinobacteria</i>      | Clone 2C228795<br>(99.85 %) [EU800635]                      | Delaware Bay, NJ, USA       | <i>Candidatus Planktophila<br/>limnetica</i><br>MWH-EgelM2-3.acI<br>(97.96 %) [FJ428831] |
| 166 | K07-93  | 6 | <i>Betaproteobacteria</i>  | RB363 clone<br>(98.56 %) [AB240354]                         | Rhizospere                  | <i>Paucibacter</i> sp. Asd M1A1<br>Asd M1A1<br>(98.48 %) [FM955854]                      |
| 167 | K07-94  | 1 | <i>Actinobacteria</i>      | Actinobacterium clone CB11A12<br>(99.20 %) [EF471696]       | Estuarine bacterioplankton  |                                                                                          |
| 168 | K07-96  | 1 | <i>Bacteroidetes</i>       | <i>Flectobacillus lacus</i> CL-GP79<br>(98.42 %) [DQ112352] | Hypertrophic pond           |                                                                                          |
| 169 | K07-98  | 7 | <i>Actinobacteria</i>      | Actinobacterium clone ZS-4-333<br>(99.49 %) [FN668241]      | Lake Zurich                 |                                                                                          |
| 170 | K07-99  | 1 | <i>Acidobacteria</i>       | UG7 clone<br>(97.87 %) [DQ298003]                           | H/C contaminated soil       | <i>Solibacter usitatus</i><br>Ellin6076<br>(93.53 %) [CP000473]                          |
| 171 | K07-100 | 1 | <i>Verrucomicrobia</i>     | Verrucomicrobia clone Amb_16S_1148<br>(92.51 %) [EF018510]  | Rhizosphere                 |                                                                                          |
| 172 | VE07-01 | 2 | <i>Actinobacteria</i>      | Actinobacterium clone TR1E4<br>(99.71 %) [EU117953]         | Freshwater                  | <i>Candidatus Planktophila<br/>limnetica</i><br>MWH-EgelM2-3.acI                         |

|     |         |   |                              |                                                                   |                               |                                                                  |
|-----|---------|---|------------------------------|-------------------------------------------------------------------|-------------------------------|------------------------------------------------------------------|
| 173 | VE07-02 | 1 | <i>Unaffiliated</i>          | Clone CK_2C2_2<br>(82.83 %) [EU488114]                            | Sediment                      | (97.82 %) [FJ428831]                                             |
| 174 | VE07-03 | 1 | <i>Alphaproteobacteria</i>   | Clone TF82<br>(98.42%) [GU272246]                                 | Rape phyllosphere             | <i>Sphingomonas</i> sp. PA218<br>(98.22 %) [AM900781]            |
| 175 | VE07-05 | 4 | <i>Betaproteobacteria</i>    | Clone UTFS-OF08-d36-85<br>(99.57 %) [AB200293]                    | Sludge                        | <i>Hydrogenophaga</i> sp. EMB<br>75<br>(99.78 %) [DQ413154]      |
| 176 | VE07-07 | 1 | <i>Bacteroidetes</i>         | <i>Sphingobacterium</i> sp. clone ZS-2-83<br>(99.57 %) [FN668091] | Lake Zurich                   | <i>Sediminibacterium</i> sp.<br>TEGAF015<br>(93.43 %) [AB470450] |
| 177 | VE07-08 | 1 | <i>Epsilonproteobacteria</i> | <i>Arcobacter</i> sp. clone A1<br>(99.20 %) [FJ968635]            | Microbial fuel cell           | <i>Arcobacter</i> sp. R-28314<br>(96.53 %) [AM084114]            |
| 178 | VE07-10 | 2 | <i>Actinobacteria</i>        | Actinobacterium clone DE1H8<br>(99.42 %) [FJ916092]               | Temperate lakes               |                                                                  |
| 179 | VE07-11 | 8 | <i>Actinobacteria</i>        | Actinobacterium clone LT1B7<br>(99.85 %) [EU117819]               | Lake epilimnion               |                                                                  |
| 180 | VE07-13 | 1 | <i>Bacteroidetes</i>         | Clone c5LKS101<br>(96.77 %) [AM086161]                            | Lake sediment                 | <i>Cytophaga</i> sp. AN-BI4<br>(88.80 %) [AM157648]              |
| 181 | VE07-15 | 2 | <i>Gammaproteobacteria</i>   | Clone Er-MS-95<br>(96.92 %) [EU542455]                            | Sediment                      | <i>Methylomonas</i> sp. LW16<br>(95.93 %) [AF150796]             |
| 182 | VE07-16 | 1 | <i>Betaproteobacteria</i>    | Clone 44<br>(99.27 %) [DQ413103]                                  | Sludge                        | <i>Dechloromonas</i> sp. MissR<br>(96.77 %) [AF170357]           |
| 183 | VE07-21 | 1 | <i>Betaproteobacteria</i>    | Clone 231ds5<br>(94.88 %) [AY212678]                              | Fecal contamination           | <i>Aquamonas fontana</i> AQ11<br>(93.36 %) [AB120965]            |
| 184 | VE07-23 | 1 | <i>Actinobacteria</i>        | Actinobacterium clone TW1C9 (99.85 %)<br>[EU117978]               | Freshwater                    |                                                                  |
| 185 | VE07-26 | 1 | <i>Betaproteobacteria</i>    | Clone 3C003467<br>(98.93 %) [EU802072]                            | Chesapeake Bay, MD,<br>USA    | <i>Rhodoferrax</i> sp. Asd M2A1<br>(98.28 %) [FM955857]          |
| 186 | VE07-28 | 1 | <i>Actinobacteria</i>        | Clone T1-57<br>(95.95 %) [GQ487919]                               | Soil                          |                                                                  |
| 187 | VE07-29 | 1 | <i>Unaffiliated</i>          | Eubacterium WCHB1-58<br>(90.04 %) [AF050610]                      | Aquifer                       |                                                                  |
| 188 | VE07-33 | 1 | <i>Betaproteobacteria</i>    | Clone DP10.4.16<br>(95.64 %) [FJ612405]                           | Dongping Lake<br>Ecosystems   |                                                                  |
| 189 | VE07-34 | 2 | <i>Gammaproteobacteria</i>   | Clone 226ds5<br>(97.79 %) [AY212673]                              | Equine Fecal<br>Contamination | <i>Pseudomonas moorei</i><br>Asd MY-A1<br>(97.63 %) [FM955889]   |
| 190 | VE07-39 | 1 | <i>Firmicutes</i>            | Clone R1B-2                                                       | Sludge                        | <i>Clostridium sticklandii</i>                                   |

|     |         |    |                            |                                                               |                                              |                                                                         |
|-----|---------|----|----------------------------|---------------------------------------------------------------|----------------------------------------------|-------------------------------------------------------------------------|
| 191 | VE07-41 | 1  | <i>Firmicutes</i>          | (89.80 %) [FJ167439]<br>Clone HTE5<br>(99.27 %) [AF418957]    | Freshwater reservoir                         | (92.17 %) [M26494]<br><i>Clostridium</i> sp. P2<br>(99.25 %) [AY949856] |
| 192 | VE07-43 | 2  | <i>Bacteroidetes</i>       | Clone DP10.4.32<br>(99.71 %) [FJ612414]                       | Dongping Lake<br>Ecosystems                  |                                                                         |
| 193 | VE07-45 | 1  | <i>Betaproteobacteria</i>  | <i>Paucibacter toxinivorans</i> S1030<br>(97.24 %) [AY515384] | Lake Vihnusjarvi sediment                    |                                                                         |
| 194 | VE07-48 | 1  | <i>Gammaproteobacteria</i> | <i>Pseudomonas</i> sp. CJ11064<br>(99.43 %) [AF500211]        |                                              |                                                                         |
| 195 | VE07-50 | 1  | <i>Actinobacteria</i>      | Clone MYS16<br>(98.72 %) [GU305737]                           | MiYu Reservoir water                         | <i>Solirubrobacter</i> sp.<br>GSoil 921<br>(88.84 %) [AB245336]         |
| 196 | VE07-51 | 1  | <i>Firmicutes</i>          | Eubacterium WCHB1-71<br>(96.64 %) [AF050585]                  | Aquifer                                      | <i>Pelospora glutarica</i> WoG13<br>(92.60 %) [AJ251214]                |
| 197 | VE07-52 | 1  | <i>Betaproteobacteria</i>  | Betaproteobacterium PIB-24<br>(99.49 %) [AM849435]            | Oligomesotrophic lake                        | <i>Rhodoferax</i> sp. Asd M2A1<br>(97.41 %) [FM955857]                  |
| 198 | VE07-53 | 1  | <i>Alphaproteobacteria</i> | Clone 2C229498<br>(97.70 %) [EU801149]                        | Delaware Bay, NJ, USA                        | <i>Methylocella palustris</i> Ch3<br>(96.38 %) [AJ563926]               |
| 199 | VE07-55 | 1  | <i>Chloroflexi</i>         | Clone 2C229133<br>(99.56 %) [EU800895]                        | Delaware Bay, NJ, USA                        |                                                                         |
| 200 | VE07-60 | 4  | <i>Betaproteobacteria</i>  | Clone ZWB5-4<br>(99.14 %) [FJ801218]                          | Wetland                                      | <i>Methylophilus</i> sp. ECd5<br>(96.61 %) [AY436794]                   |
| 201 | VE07-61 | 1  | <i>Chloroflexi</i>         | Chloroflexi clone FNE11-8<br>(99.34 %) [DQ501314]             | Lake water                                   | <i>Kouleothrix aurantiaca</i><br>MYSI-A<br>(86.14 %) [AB079639]         |
| 202 | VE07-62 | 1  | <i>Acidobacteria</i>       | Clone 2h-18<br>(97.46 %) [FJ444648]                           | Rhizosphere                                  |                                                                         |
| 203 | VE07-63 | 1  | <i>Actinobacteria</i>      | Clone ML-7-114.2<br>(96.47 %) [DQ520182]                      | Shallow hypertrophic<br>freshwater lake      |                                                                         |
| 204 | VE07-64 | 1  | <i>Betaproteobacteria</i>  | Betaproteobacterium clone ZS-4-32<br>(99.57 %) [FN668031]     | Lake Zurich                                  | <i>Paucibacter</i> sp. Asd M1A1<br>(97.70 %) [FM955854]                 |
| 205 | VE07-68 | 2  | <i>Betaproteobacteria</i>  | Clone HDBW-WB08<br>(99.49 %) [AB237671]                       | Aquifer                                      | <i>Dechloromonas</i> sp. MissR<br>(97.71 %) [AF170357]                  |
| 206 | VE07-69 | 11 | <i>Actinobacteria</i>      | Clone MYW3<br>(99.64 %) [GU305754]                            | YangHe reservoir/MinYun<br>reservoir         |                                                                         |
| 207 | VE07-71 | 2  | <i>Actinobacteria</i>      | Clone YHW22<br>(99.49 %) [GU305846]                           | YangHe reservoir/MinYun<br>reservoir (China) |                                                                         |

|             |         |   |                              |                                                                    |                                      |                                                               |
|-------------|---------|---|------------------------------|--------------------------------------------------------------------|--------------------------------------|---------------------------------------------------------------|
| 208         | VE07-72 | 1 | <i>Actinobacteria</i>        | Actinobacterium clone CB11A12<br>(98.70 %) [EF471696]              | Estuarine bacterioplankton           |                                                               |
| 209         | VE07-73 | 4 | <i>Actinobacteria</i>        | Actinobacterium clone ZS-4-333<br>(99.64 %) [FN668241]             | Lake Zurich                          |                                                               |
| 210         | VE07-75 | 1 | <i>Alphaproteobacteria</i>   | <i>Bradyrhizobium</i> sp. BTAi1<br>(94.59 %) [CP000494]            |                                      |                                                               |
| 211         | VE07-76 | 1 | <i>Epsilonproteobacteria</i> | Clone SLB319<br>(98.41 %) [DQ787688]                               | Temperate lake sediment              | <i>Sulfuricurvum kujiense</i><br>YK-3<br>(94.81 %) [AB080644] |
| 212         | VE07-78 | 1 | <i>Betaproteobacteria</i>    | Clone sl1354<br>(98.78 %) [EU244075]                               | River Leine sediment                 | <i>Massilia timonae</i> CP183-9<br>(98.57 %) [AJ871463]       |
| 213         | VE07-79 | 7 | <i>Betaproteobacteria</i>    | Clone 3C002700<br>(99.71 %) [EU801416]                             | Chesapeake Bay, MD, USA              |                                                               |
| 214         | VE07-82 | 1 | <i>Bacteroidetes</i>         | <i>Flectobacillus</i> sp.<br>clone ZS-2-89<br>(99.78 %) [FN668109] | Lake Zurich                          | <i>Arcicella</i> sp. MG83<br>(93.38 %) [AJ746140]             |
| 215         | VE07-85 | 2 | <i>Unaffiliated</i>          | Clone YHY15<br>(99.85 %) [GU305800]                                | Shallow hypertrophic lake            |                                                               |
| 216         | VE07-89 | 1 | <i>Alphaproteobacteria</i>   | Clone DP10.4.4<br>(99.63 %) [FJ612398]                             | Dongping Lake<br>Ecosystems          |                                                               |
| 217         | VE07-90 | 1 | <i>Alphaproteobacteria</i>   | Clone DP7.3.104<br>(98.74 %) [FJ612228]                            | Dongping Lake<br>Ecosystems          | <i>Roseomonas</i> sp. SK 65<br>(96.13 %) [AM991117]           |
| 218         | VE07-92 | 1 | <i>Firmicutes</i>            | Clone HH_aai36f02<br>(95.18 %) [EU459333]                          | Mammal gut                           | <i>Epulopiscium</i> sp. N.I. 1_5<br>(93.35 %) [AY844964]      |
| 219         | VE07-96 | 5 | <i>Actinobacteria</i>        | Clone MYS21<br>(99.78 %) [GU305741]                                | YangHe reservoir/MinYun<br>reservoir |                                                               |
| <b>2008</b> |         |   |                              |                                                                    |                                      |                                                               |
| 220         | A08-102 | 2 | <i>Chloroflexi</i>           | Crater Lake clone CL500-48<br>(99.12 %) [AF316757]                 | Oligotrophic Crater Lake<br>water    |                                                               |
| 221         | A08-106 | 1 | <i>Unaffiliated</i>          | Clone 2C228453<br>(85.33 %) [EU800378]                             | Delaware Bay, NJ, USA                |                                                               |
| 222         | A08-107 | 1 | <i>Betaproteobacteria</i>    | Proteobacterium clone F13_2C_FL<br>(97.92 %) [EF682968]            | African dust                         | <i>Herbaspirillum</i> sp.<br>GT-L15 (<br>97.75 %) [GQ355286]  |
| 223         | A08-108 | 6 | <i>Actinobacteria</i>        | Clone MYY14<br>(99.27 %) [GU305708]                                | YangHe reservoir/MinYun<br>reservoir |                                                               |
| 224         | A08-109 | 2 | <i>Planctomycetes</i>        | Clone DP7.3.10<br>(95.16 %) [FJ612210]                             | Dongping Lake Ecosystems             | Planctomycete<br>GMD21C08 (84.63%)<br>[AY162119]              |

|     |         |   |                            |                                                                      |                                   |                                                               |
|-----|---------|---|----------------------------|----------------------------------------------------------------------|-----------------------------------|---------------------------------------------------------------|
| 225 | A08-113 | 2 | <i>Gammaproteobacteria</i> | <i>Pseudoxanthomonas mexicana</i><br>AMX 26B<br>(91.52 %) [AF273082] | UASB reactor sludge               |                                                               |
| 226 | A08-119 | 1 | <i>Alphaproteobacteria</i> | Clone D44 35<br>(99.70 %) [EU580491]                                 | Lake Constance                    | <i>Sphingomonas</i> sp. B18<br>(99.85 %) [AF410927]           |
| 227 | A08-121 | 1 | <i>Bacteroidetes</i>       | Bacteroidetes cloneAS30<br>(98.18 %) [EU283361]                      | Wastewater                        | <i>Tuber borchii</i> symbiont b-17BO<br>(95.11 %) [AF070444]  |
| 228 | A08-122 | 3 | <i>Planctomycetes</i>      | Clone DP10.2.53<br>(94.38 %) [FJ612357]                              | Dongping Lake Ecosystems          |                                                               |
| 229 | A08-123 | 3 | <i>Bacteroidetes</i>       | Clone 3C003304<br>(99.71 %) [EU801923]                               | Chesapeake Bay, MD, USA           | <i>Owenweeksia hongkongensis</i><br>(88.80 %) [AB125062]      |
| 230 | A08-125 | 1 | <i>Bacteroidetes</i>       | Clone SING480<br>(99.42 %) [HM129126]                                | Tibetan Lake (China)              | <i>Sediminibacterium</i> sp. TEGAF015<br>(93.86 %) [AB470450] |
| 231 | A08-126 | 1 | <i>Gammaproteobacteria</i> | Clone S25_35<br>(95.65 %) [EF573691]                                 | Coco's island                     | <i>Coxiella burnetii</i> CbuK_Q154<br>(87.20 %) [CP001020]    |
| 232 | A08-127 | 8 | <i>Actinobacteria</i>      | Clone MYW3<br>(99.78 %) [GU305754]                                   | YangHe reservoir/MinYun reservoir |                                                               |
| 233 | A08-131 | 1 | <i>Unaffiliated</i>        | Clone ML-9-34.2<br>(96.55 %) [DQ520188]                              | Hypertrophic lake                 |                                                               |
| 234 | A08-132 | 1 | <i>Bacteroidetes</i>       | Clone MYY7<br>(95.86 %) [GU305702]                                   | YangHe reservoir/MinYun reservoir |                                                               |
| 235 | A08-134 | 1 | <i>Chloroflexi</i>         | Clone MYS10<br>(99.48 %) [GU305734]                                  | YangHe reservoir/MinYun reservoir |                                                               |
| 236 | A08-135 | 1 | <i>Betaproteobacteria</i>  | Clone FA02B02<br>(99.34 %) [FM872672]                                | House dust                        | <i>Massilia brevitalea</i> byr23-80<br>(98.77 %) [EF546777]   |
| 237 | A08-136 | 2 | <i>Bacteroidetes</i>       | Clone 2C229371<br>(99.78 %) [EU801066]                               | Delaware Bay, NJ, USA             | <i>Arcicella</i> sp. MG83<br>(93.66 %) [AJ746140]             |
| 238 | A08-137 | 1 | <i>Betaproteobacteria</i>  | Clone ML-5-90.2<br>(99.86 %) [DQ520167]                              | Shallow hypertrophic lake         | <i>Variovorax</i> sp. EMB 263<br>(97.89 %) [DQ413166]         |
| 239 | A08-139 | 1 | <i>Planctomycetes</i>      | Clone K0029 (97.04 %) [FJ820433]                                     | Wuliangshuai Lake (China)         |                                                               |
| 240 | A08-140 | 1 | <i>Alphaproteobacteria</i> | <i>Sphingomonas dokdonensis</i> DS-4<br>(99.17 %) [DQ178975]         | Soil                              |                                                               |
| 241 | A08-141 | 3 | <i>Actinobacteria</i>      | Clone MYS21<br>(99.85 %) [GU305741]                                  | YangHe reservoir/MinYun reservoir |                                                               |



|     |         |    |                            |                                                                          |                              |                                                                          |
|-----|---------|----|----------------------------|--------------------------------------------------------------------------|------------------------------|--------------------------------------------------------------------------|
| 242 | A08-142 | 10 | <i>Unaffiliated</i>        | SAR11 cluster Alphaproteobacterium clone ZS-4-50<br>(99.48 %) [FN665765] | Temperate lakes              |                                                                          |
| 243 | A08-148 | 1  | <i>Unaffiliated</i>        | Clone 6S1-13<br>(99.12 %) [GU208248]                                     | Dongping Lake sediment       |                                                                          |
| 244 | A08-150 | 1  | <i>Alphaproteobacteria</i> | Clone A-35<br>(99.63 %) [GQ472125]                                       | Algicidal enrichment culture | <i>Rhizobium</i> sp. W3<br>(99.33 %) [EU781656]                          |
| 245 | A08-153 | 1  | <i>Alphaproteobacteria</i> | Alphaproteobacterium clone Xbod17<br>(92.99 %) [GU129938]                | Marine worm                  | <i>Phaeospirillum fulvum</i> S3<br>(91.54 %) [AF508113]                  |
| 246 | A08-155 | 1  | <i>Actinobacteria</i>      | Actinobacterium clone LA1C3<br>(98.84 %) [FJ916093]                      | Temperate lakes              | <i>Actinomycetales</i> bacterium<br>GSoil 1632<br>(89.76 %) [AB245397]   |
| 247 | A08-156 | 1  | <i>Actinobacteria</i>      | Clone 5C231028<br>(99.42 %) [EU803457]                                   | Lake Gatun, Panama           |                                                                          |
| 248 | A08-159 | 1  | <i>Actinobacteria</i>      | Clone 3C003327<br>(99.78 %) [EU801945]                                   | Chesapeake Bay, MD, USA      |                                                                          |
| 249 | A08-160 | 3  | <i>Bacteroidetes</i>       | <i>Sphingobacterium</i> sp. clone ZS-2-342<br>(98.51 %) [FN668080]       | Lake Zurich                  | <i>Terrimonas lutea</i><br>(95.54 %) [AB192292]                          |
| 250 | A08-163 | 4  | <i>Unaffiliated</i>        | Clone IC-33<br>(97.09 %) [AB255061]                                      | Corroding concrete           |                                                                          |
| 251 | A08-165 | 1  | <i>Alphaproteobacteria</i> | <i>Afipia broomeae</i> F186<br>(99.70 %) [U87759]                        |                              |                                                                          |
| 252 | A08-166 | 1  | <i>Gammaproteobacteria</i> | <i>Legionella</i> -like amoebal pathogen HT99<br>(93.11 %) [AY741401]    | Hot tub                      | <i>Ectothiorhodospira</i> sp.<br>AM4<br>(90.16 %) [EU252492]             |
| 253 | A08-171 | 5  | <i>Bacteroidetes</i>       | Clone DP10.4.3<br>(98.49 %) [FJ612397]                                   | Dongping Lake Ecosystems     |                                                                          |
| 254 | B08-101 | 1  | <i>Cyanobacteria</i>       | Clone DP3.2.22<br>(99.18 %) [FJ612143]                                   | Dongping Lake Ecosystems     | <i>Thalassiosira pseudonana</i><br>- chloroplast<br>(98.59 %) [EF067921] |
| 255 | B08-102 | 4  | <i>Actinobacteria</i>      | Actinobacterium clone CH1D5<br>(99.85 %) [EU117613]                      | Lake epilimnion              |                                                                          |
| 256 | B08-103 | 1  | <i>Actinobacteria</i>      | Actinobacterium clone 79 T12d-oil<br>(94.93 %) [FM242392]                | Sediment                     | <i>Candidatus Microthrix calida</i> TNO2-1<br>(90.59 %) [DQ147277]       |
| 257 | B08-104 | 2  | <i>Planctomycetes</i>      | Clone DP10.2.53<br>(94.24 %) [FJ612357]                                  | Dongping Lake Ecosystems     |                                                                          |
| 258 | B08-105 | 1  | <i>Bacteroidetes</i>       | Flexibacteraceae bacterium 1351 (97.08%)                                 | Soil                         | <i>Hymenobacter</i> sp.                                                  |

|       |         |   |                            |                                                                    |                                            |                                                                                          |
|-------|---------|---|----------------------------|--------------------------------------------------------------------|--------------------------------------------|------------------------------------------------------------------------------------------|
|       |         |   |                            | [EU543663]                                                         |                                            | SAFR-033<br>(92.99%) [AY167829]                                                          |
| 259   | B08-107 | 8 | <i>Actinobacteria</i>      | Clone MYW3<br>(99.64 %) [GU305754]                                 | YangHe reservoir/MinYun<br>reservoir       |                                                                                          |
| 260   | B08-108 | 2 | <i>Bacteroidetes</i>       | Clone 3C003304<br>(99.93 %) [EU801923]                             | Chesapeake Bay, MD, USA                    | <i>Owenweeksia<br/>hongkongensis</i><br>(88.94 %) [AB125062]                             |
| 261   | B08-114 | 1 | <i>Gammaproteobacteria</i> | Clone DP10.3.24<br>(95.96 %) [FJ612378]                            | Dongping Lake Ecosystems                   |                                                                                          |
| 262   | B08-115 | 1 | <i>Bacteroidetes</i>       | Bacteroidetes clone XZXXH108<br>(96.85 %) [EU703423]               | Tibetan lakes                              | <i>Coccinistipes vermicola</i><br>IMCC1411<br>(84.95 %) [EF108212]                       |
| 263   | B08-116 | 1 | <i>Actinobacteria</i>      | Actinobacterium clone CB11A12<br>(99.20 %) [EF471696]              | Estuarine bacterioplankton                 |                                                                                          |
| 264   | B08-118 | 1 | <i>Deltaproteobacteria</i> | Clone S11-22<br>(89.12 %) [EU287205]                               | Surface sediment (Pacific<br>Arctic Ocean) | <i>Desulforhopalus<br/>vacuolatus</i><br>(83.77 %) [L42613]                              |
| 265 C | B08-120 | 1 | <i>Bacteroidetes</i>       | <i>Sphingobacterium</i> sp. clone ZS-2-342<br>(98.65 %) [FN668080] | Lake Zurich                                | <i>Terrimonas lutea</i><br>(94.06 %) [AB192292]                                          |
| 266   | B08-123 | 2 | <i>Bacteroidetes</i>       | Sphingobacteriales clone SF07<br>(98,56 %) [AJ697707]              | Mesotrophic lake                           | <i>Candidatus Aquirestis<br/>calciphila</i> MS-Falk1-L<br>(98.39 %) [AJ786341]           |
| 267   | B08-127 | 9 | <i>Alphaproteobacteria</i> | Clone DP10.4.4<br>(99.41 %) [FJ612398]                             | Dongping Lake Ecosystems                   |                                                                                          |
| 268   | B08-137 | 1 | <i>Deltaproteobacteria</i> | Clone 5C231108<br>(96.12 %) [EU803523]                             | Aquatic Bacterial<br>Communities           |                                                                                          |
| 269   | B08-138 | 2 | <i>Actinobacteria</i>      | Clone MYS21<br>(99.56 %) [GU305741]                                | YangHe reservoir/MinYun<br>reservoir       |                                                                                          |
| 270   | B08-139 | 3 | <i>Actinobacteria</i>      | Clone 5C230997<br>(95.39 %) [EU803430]                             | Lake Gatun, Panama                         |                                                                                          |
| 271   | B08-146 | 6 | <i>Actinobacteria</i>      | Actinobacterium clone ZS-2-309<br>(99.13 %) [FN668222]             | Lake Zurich                                | <i>Candidatus Planktophila<br/>limnetica</i><br>MWH-EgelM2-3.acI<br>(97.31 %) [FJ428831] |
| 272   | B08-148 | 3 | <i>Bacteroidetes</i>       | Clone K2-30-6<br>(95.14 %) [AY344418]                              | Hawaiian archipelago                       |                                                                                          |
| 273   | B08-149 | 3 | <i>Alphaproteobacteria</i> | Clone S25_718<br>(89.70 %) [EF574374]                              | Coco's island                              | <i>Filomicrobium insigne</i><br>SLG5B-19                                                 |

|     |         |    |                            |                                                                                                                                            |                                                   |                                                                                |
|-----|---------|----|----------------------------|--------------------------------------------------------------------------------------------------------------------------------------------|---------------------------------------------------|--------------------------------------------------------------------------------|
| 274 | B08-151 | 1  | <i>Actinobacteria</i>      | Clone D19<br>(99.49 %) [EU234320]                                                                                                          | Wang Yang River                                   | (85.00 %) [EF117253]                                                           |
| 275 | B08-154 | 2  | <i>Actinobacteria</i>      | Actinobacteria clone QEDV2AC09<br>(97.17 %) [CU919363]                                                                                     | Sludge                                            | <i>Cellulomonas</i> sp. F11<br>(90.98 %) [EU697083]                            |
| 276 | B08-158 | 1  | <i>Bacteroidetes</i>       | Clone DP10.4.3<br>(98.42 %) [FJ612397]                                                                                                     | Dongping Lake Ecosystems                          |                                                                                |
| 277 | K08-101 | 1  | <i>Alphaproteobacteria</i> | <i>Bradyrhizobium</i> sp. SOD34<br>(99.48 %) [EF125933]                                                                                    |                                                   |                                                                                |
| 278 | K08-102 | 2  | <i>Bacteroidetes</i>       | Clone 3C003304<br>(99.45 %) [EU801923]                                                                                                     | Chesapeake Bay, MD, USA                           | <i>Owenweeksia</i><br><i>hongkongensis</i><br>(88.60 %) [AB125062]             |
| 279 | K08-104 | 16 | <i>Alphaproteobacteria</i> | Clone DP10.4.4<br>(99.93 %) [EU803730]                                                                                                     | Lake Gatun, Panama                                |                                                                                |
| 280 | K08-106 | 4  | <i>Actinobacteria</i>      | Clone MYW3<br>(99.64 %) [GU305754]                                                                                                         | YangHe reservoir/MinYun<br>reservoir              |                                                                                |
| 281 | K08-107 | 3  | <i>Actinobacteria</i>      | Clone MYS21<br>(99.71%) [GU305741]                                                                                                         | YangHe reservoir/MinYun<br>reservoir              |                                                                                |
| 282 | K08-108 | 2  | <i>Planctomycetes</i>      | Clone DP10.2.53<br>(94.59 %) [FJ612357]                                                                                                    | Dongping Lake Ecosystems                          |                                                                                |
| 283 | K08-109 | 3  | <i>Betaproteobacteria</i>  | <i>Curvibacter</i> putative symbiont of <i>Hydra</i><br><i>magnipapillata</i> genomic scaffold<br>HmaUn_WGA71069_1<br>(99.35 %) [FN543107] | Symbiont of <i>Hydra</i><br><i>magnipapillata</i> | <i>Aquamonas fontana</i><br>AQ11<br>(98.42 %) [AB120965]                       |
| 284 | K08-110 | 1  | <i>Alphaproteobacteria</i> | Clone DP7.3.104<br>(99.18 %) [FJ612228]                                                                                                    | Dongping Lake Ecosystems                          | <i>Roseomonas</i> sp. SK 65<br>(96.35 %) [AM991117]                            |
| 285 | K08-112 | 1  | <i>Planctomycetes</i>      | Clone nbw428a05c1<br>(94.66 %) [GQ094017]                                                                                                  | Human skin microbiome                             | Planctomycete isolate A-2<br>(81.03 %) [AM056027]                              |
| 286 | K08-113 | 1  | <i>Bacteroidetes</i>       | Clone DP7.5.43<br>(97.93 %) [FJ612299]                                                                                                     | Dongping Lake Ecosystems                          |                                                                                |
| 287 | K08-114 | 5  | <i>Bacteroidetes</i>       | Clone 2C229371<br>(99.64 %) [EU801066]                                                                                                     | Delaware Bay, NJ, USA                             | <i>Arcicella</i> sp. MG83<br>(93.06 %) [AJ746140]                              |
| 288 | K08-115 | 2  | <i>Verrucomicrobia</i>     | Clone MYW29<br>(98.79 %) [GU305773]                                                                                                        | YangHe reservoir/MinYun<br>reservoir              | <i>Methylacidiphilum</i><br><i>inferorum</i> V4 CP000975<br>(84 %) [CP000975 ] |
| 289 | K08-116 | 1  | <i>Verrucomicrobia</i>     | Clone aab56b01<br>(95.05 %) [DQ814962]                                                                                                     | Adult zebrafish<br>digestive tract                | <i>Luteolibacter pohnpeiensis</i><br>A4T-83<br>(89.51 %) [AB331895]            |
| 290 | K08-117 | 3  | <i>Chloroflexi</i>         | Crater Lake clone CL500-48                                                                                                                 | Oligotrophic Crater lake                          |                                                                                |

|     |          |   |                            |                                                                  |                                                  |                                                                                |
|-----|----------|---|----------------------------|------------------------------------------------------------------|--------------------------------------------------|--------------------------------------------------------------------------------|
| 291 | K08-118  | 1 | <i>Planctomycetes</i>      | (99.41 %) [AF316757]<br>Crater Lake clone CL500-3                | water<br>Oligotrophic Crater lake                |                                                                                |
| 292 | K08-120  | 1 | <i>Gammaproteobacteria</i> | (93.71 %) [AF316767]<br>Clone MC1_16S_55<br>(98.99 %) [EU662624] | water<br>Sulfidic water, Movile<br>Cave, Romania | <i>Rheinheimera chironomi</i><br>K19414<br>(98.12%) [DQ298025]                 |
| 293 | K08-122  | 4 | <i>Actinobacteria</i>      | Actinobacterium<br>clone ZS-4-333<br>(97.90 %) [FN668241]        | Lake Zurich                                      |                                                                                |
| 294 | K08-123  | 1 | <i>Betaproteobacteria</i>  | Clone DP10.4.16<br>(97.60 %) [FJ612405]                          | Dongping Lake Ecosystems                         | <i>Polynucleobacter<br/>acidiphobus</i><br>MWH-IPGL7W22<br>(97.55%) [AJ876403] |
| 295 | K08-125  | 1 | <i>Bacteroidetes</i>       | Sphingobacteriales clone SF68<br>(98.35 %) [AJ697704]            | Mesotrophic lake                                 | <i>Algoriphagus</i> sp.<br>RC-layer4<br>(95.78 %) [EU677424]                   |
| 296 | K08-127  | 1 | <i>Actinobacteria</i>      | Clone SINI1012<br>(96.27 %) [HM126680]                           | Chaerhan Lake<br>(China)                         | <i>Kaistibacter<br/>ginsenosidimitans</i><br>BXN7-7<br>(89.50 %) [EU423306]    |
| 297 | K08-128  | 1 | <i>Gammaproteobacteria</i> | Gammaproteobacterium clone GPTSA100-21<br>(97.06 %) [DQ914844]   | Spring (India)                                   | <i>Rheinheimera</i> sp.<br>G2DM-88<br>(95.78 %) [EU037269 ]                    |
| 298 | K08-142  | 1 | <i>Alphaproteobacteria</i> | Clone DP7.5.111 (92.96 %) [FJ612309]                             | Dongping Lake Ecosystems                         | <i>Azorhizobium caulinodans</i><br>ORS 571<br>(83.99 %) [AP009384]             |
| 299 | K08-144  | 1 | <i>Bacteroidetes</i>       | Sphingobacterium sp.<br>clone ZS-2-342<br>(99.29 %) [FN668080]   | Lake Zurich                                      | <i>Terrimonas lutea</i><br>(94.70 %) [AB192292]                                |
| 300 | K08-148  | 1 | <i>Actinobacteria</i>      | Clone 3C002490<br>(87.09 %) [EU801240]                           | Chesapeake Bay, MD, USA                          | <i>Friedmanniella spumicola</i><br>(84.95 %) [AF062535]                        |
| 301 | K08-150  | 1 | <i>Actinobacteria</i>      | Actinobacterium clone CB11A12<br>(99.20 %) [EF471696]            | Estuarine bacterioplankton                       |                                                                                |
| 302 | VE08-102 | 1 | <i>Actinobacteria</i>      | <i>Blastococcus</i> sp. BC521<br>(99.12 %) [AJ316573]            |                                                  |                                                                                |
| 303 | VE08-104 | 2 | <i>Betaproteobacteria</i>  | Clone 015B-E09<br>(98.57 %) [AY662039]                           | Groundwater                                      | <i>Siderooxidans<br/>lithoautotrophicus</i> ES-1<br>(95.51 %) [DQ386264]       |

|     |          |    |                            |                                                                |                                   |                                                                          |
|-----|----------|----|----------------------------|----------------------------------------------------------------|-----------------------------------|--------------------------------------------------------------------------|
| 304 | VE08-105 | 10 | <i>Actinobacteria</i>      | Actinobacterium clone ZS-2-02 (99.78 %) [FN668289]             | Lake Zurich                       |                                                                          |
| 305 | VE08-108 | 1  | <i>Bacteroidetes</i>       | Clone DP7.4.54 (95.35 %) [FJ612278]                            | Dingpong Lake Ecosystems          | <i>Hymenobacter</i> sp. 29F (87.77%) [AY647897]                          |
| 306 | VE08-109 | 4  | <i>Chloroflexi</i>         | Clone 2C229133 (99.48 %) [EU800895]                            |                                   |                                                                          |
| 307 | VE08-110 | 6  | <i>Unaffiliated</i>        | Eubacterium WCHB1-58 (88.24 %) [AF050610]                      | Aquifer                           |                                                                          |
| 308 | VE08-113 | 1  | <i>Cyanobacteria</i>       | Clone DP7.1.5 (97.99 %) [FJ612231]                             | Dongping Lake Ecosystems          | <i>Coscinodiscus radiatus</i> - chloroplast p148 (88.41 %) [AJ536462]    |
| 309 | VE08-114 | 1  | <i>Alphaproteobacteria</i> | Alphaproteobacterium clone TK-NH3 (99.18 %) [DQ463742]         | Tanganyika Lake                   | <i>Sphingomonas</i> sp. CC-LTT-6 (99.18 %) [AY941088]                    |
| 310 | VE08-115 | 1  | <i>Planctomycetes</i>      | Clone MYS7 (99.27 %) [GU305732]                                | YangHe reservoir/MinYun reservoir | <i>Planctomycete</i> str. 535 (92.64 %) [AJ231176]                       |
| 311 | VE08-118 | 1  | <i>Betaproteobacteria</i>  | Clone 2_G8 (98.50 %) [EU589321]                                | Soil                              | <i>Methylophilus</i> sp. enrichment culture MWE_C44 (98.28 %) [FJ391507] |
| 312 | VE08-120 | 1  | <i>Bacteroidetes</i>       | <i>Sphingobacterium</i> sp. clone ZS-2-83 (99.64 %) [FN668091] | Lake Zurich                       | <i>Sediminibacterium</i> sp. TEGAF015 (93.51 %) [AB470450]               |
| 313 | VE08-121 | 2  | <i>Betaproteobacteria</i>  | Clone S25_868 (99.35 %) [EF574524]                             | Coco's island                     | <i>Limnobacter thiooxidans</i> CS-K2 (98.99 %) [AJ289885]                |
| 314 | VE08-123 | 3  | <i>Planctomycetes</i>      | Planctomycete clone CY0ARA030H03 (97.37 %) [BX294821]          | Anaerobic digester                | <i>Planctomyces</i> sp. ( 599) (87.12 %) [AJ231189]                      |
| 315 | VE08-126 | 4  | <i>Betaproteobacteria</i>  | Betaproteobacterium clone ADK-CSe02-53 (99.42 %) [EF520468]    | Acid impacted lake                |                                                                          |
| 316 | VE08-129 | 1  | <i>Planctomycetes</i>      | <i>Singulisphaera</i> sp. clone 2h-7 (97.76%) [FJ444639]       | Rhizosphere                       | <i>Singulisphaera acidiphila</i> MPL1015 (96.97 %) [AM902525]            |
| 317 | VE08-130 | 1  | <i>Firmicutes</i>          | Clone SS_WC_22 (89.96 %) [FJ973592]                            | Lake                              | <i>Acetivibrio cellulolyticus</i> (ATCC 33288) (87.28 %) [L35516]        |

|     |          |   |                            |                                                          |                                      |                                                                                          |
|-----|----------|---|----------------------------|----------------------------------------------------------|--------------------------------------|------------------------------------------------------------------------------------------|
| 318 | VE08-131 | 3 | <i>Planctomycetes</i>      | Clone ambient_uncontrolled-78<br>(96.36 %) [GU454939]    | Sludge                               | <i>P. limnophilus</i><br>(88.22 %) [X62911]                                              |
| 319 | VE08-133 | 1 | <i>Actinobacteria</i>      | Actinobacterium clone ZS-2-309<br>(99.20 %) [FN668222]   | Lake Zurich                          | <i>Candidatus Planktophilia<br/>limnetica</i><br>MWH-EgelM2-3.acI<br>(97.38%) [FJ428831] |
| 320 | VE08-134 | 4 | <i>Actinobacteria</i>      | Clone MYS21<br>(99.78%) [GU305741]                       | YangHe reservoir/MinYun<br>reservoir |                                                                                          |
| 321 | VE08-135 | 1 | <i>Bacteroidetes</i>       | Clone MYY7<br>(96.08 %) [GU305702]                       | YangHe reservoir/MinYun<br>reservoir |                                                                                          |
| 322 | VE08-138 | 1 | <i>Betaproteobacteria</i>  | Clone 3BH-10FF<br>(99.35 %) [EU937983]                   | Freshwater environment               | <i>Rhodoferrax</i> sp. Asd M2A1<br>(99.14 %) [FM955857]                                  |
| 323 | VE08-140 | 1 | <i>Alphaproteobacteria</i> | Clone FGL7S_B51<br>(97.36 %) [FJ437985]                  | Fayetteville Green Lake<br>(NY)      | <i>Sphingobacterium</i> sp.<br>P-17<br>(91.46 %) [AM411963]                              |
| 324 | VE08-141 | 1 | <i>Alphaproteobacteria</i> | Alphaproteobacterium clone F0813<br>(99.41 %) [AF235997] |                                      | <i>Sphingomonas</i> sp. B18<br>(96.95 %) [AF410927]                                      |
| 325 | VE08-144 | 2 | <i>Bacteroidetes</i>       | Sphingobacteriales<br>clone SF68<br>(99.21 %) [AJ697704] | Mesotrophic lake                     | <i>Algoriphagus aquatilis</i><br>A8-7<br>(97.28 %) [EU313811]                            |
| 326 | VE08-145 | 1 | <i>Actinobacteria</i>      | Actinobacterium<br>clone DE1H8<br>(98.91 %) [FJ916092]   | Temperate lake                       |                                                                                          |
| 327 | VE08-147 | 1 | <i>Bacteroidetes</i>       | Clone K2-30-6<br>(95.14 %) [AY344418]                    | Hawaiian archipelago                 |                                                                                          |
| 328 | VE08-148 | 1 | <i>Betaproteobacteria</i>  | Clone DP10.4.6<br>(99.50%) [FJ612399]                    | Dongping Lake Ecosystems             | <i>Pandoraea</i> sp. Y1<br>(93%) [AB222022]                                              |
| 329 | VE08-149 | 4 | <i>Actinobacteria</i>      | Actinobacterium clone LA1C3<br>(99.20 %) [FJ916093]      | temperate lakes                      | <i>Actinomycetales</i> bacterium<br>GSoil 1632<br>(90.19 %) [AB245397]                   |
| 330 | VE08-150 | 1 | <i>Actinobacteria</i>      | Clone D19<br>(99.71 %) [EU234320]                        | Wang Yang River                      |                                                                                          |
| 331 | VE08-152 | 2 | <i>Chloroflexi</i>         | Clone SRRB40<br>(94.98 %) [AB240513]                     | Rhizosphere                          |                                                                                          |
| 332 | VE08-154 | 1 | <i>Actinobacteria</i>      | Actinobacterium<br>clone LT1B7<br>(99.98 %) [EU117819]   | Freshwater                           |                                                                                          |
| 333 | VE08-155 | 2 | <i>Alphaproteobacteria</i> | Clone S25_718<br>(89.84 %) [EF574374]                    | Coco's island                        | <i>Filomicrobium insigne</i><br>SLG5B-19                                                 |

|     |          |   |                            |                                                                   |                          |                      |
|-----|----------|---|----------------------------|-------------------------------------------------------------------|--------------------------|----------------------|
| 334 | VE08-160 | 1 | <i>Betaproteobacteria</i>  | Clone DP10.4.32<br>(99.79 %) [FJ612414]                           | Dongping Lake Ecosystems | (85.15 %) [EF117253] |
| 335 | VE08-161 | 1 | <i>Betaproteobacteria</i>  | Clone B67<br>(98.21 %) [FJ660535]                                 | Activated sludge         |                      |
| 336 | VE08-162 | 1 | <i>Actinobacteria</i>      | Actinobacterium<br>clone TW1B6<br>(99.78 %) [EU117973]            | Lake epilimnion          |                      |
| 337 | VE08-163 | 1 | <i>Alphaproteobacteria</i> | <i>Brevundimonas vesicularis</i> Asd M7-3<br>(99.55 %) [FM955876] | Glacier                  |                      |

---

11

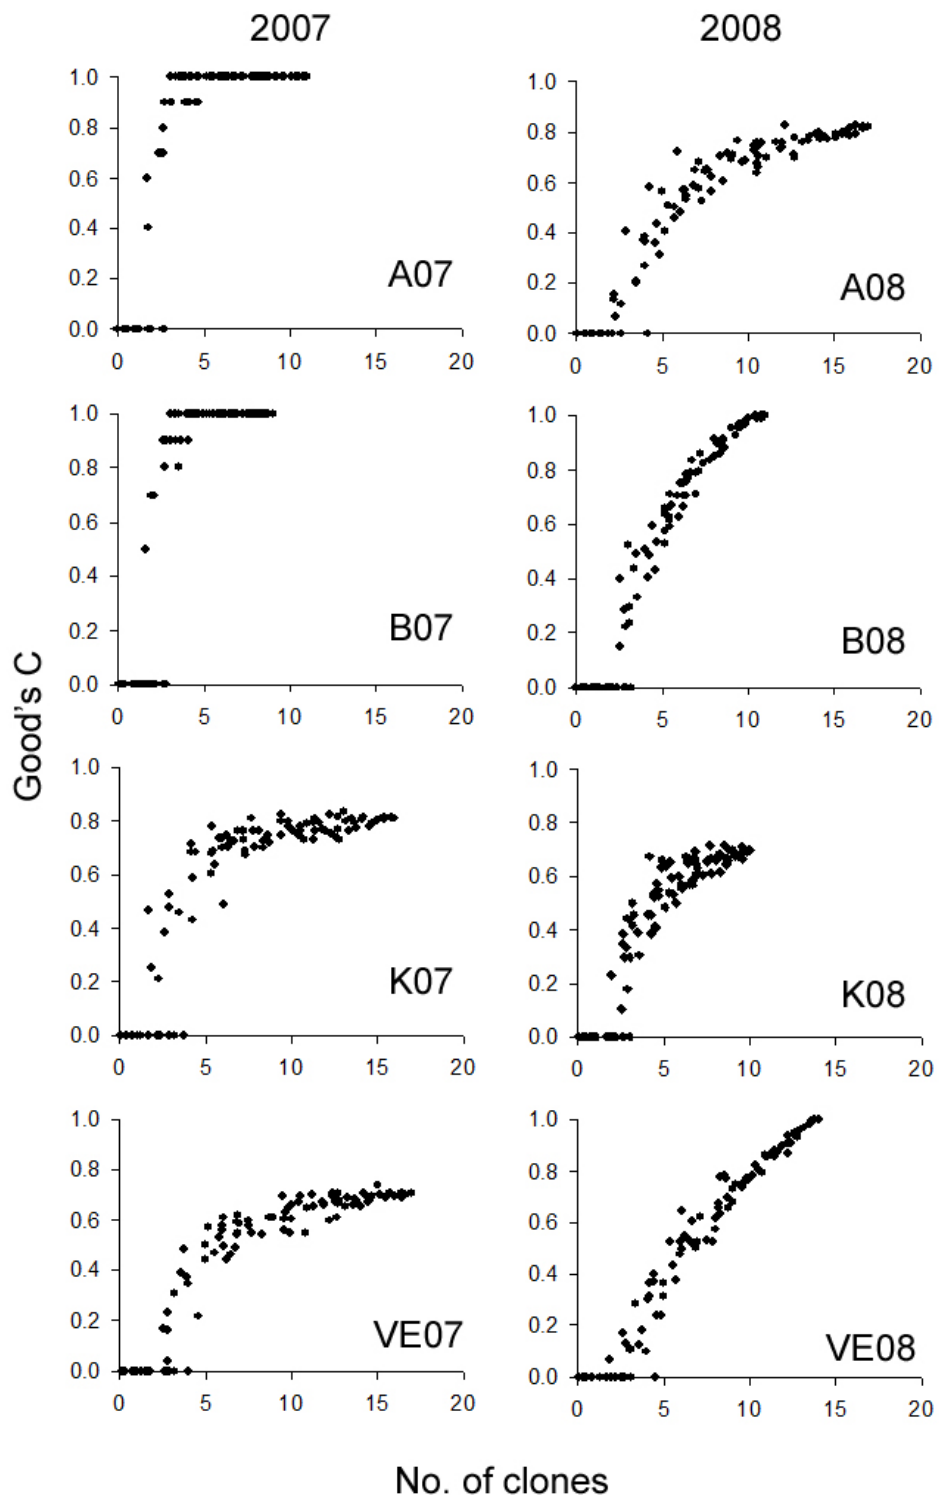

Fig. S1A.



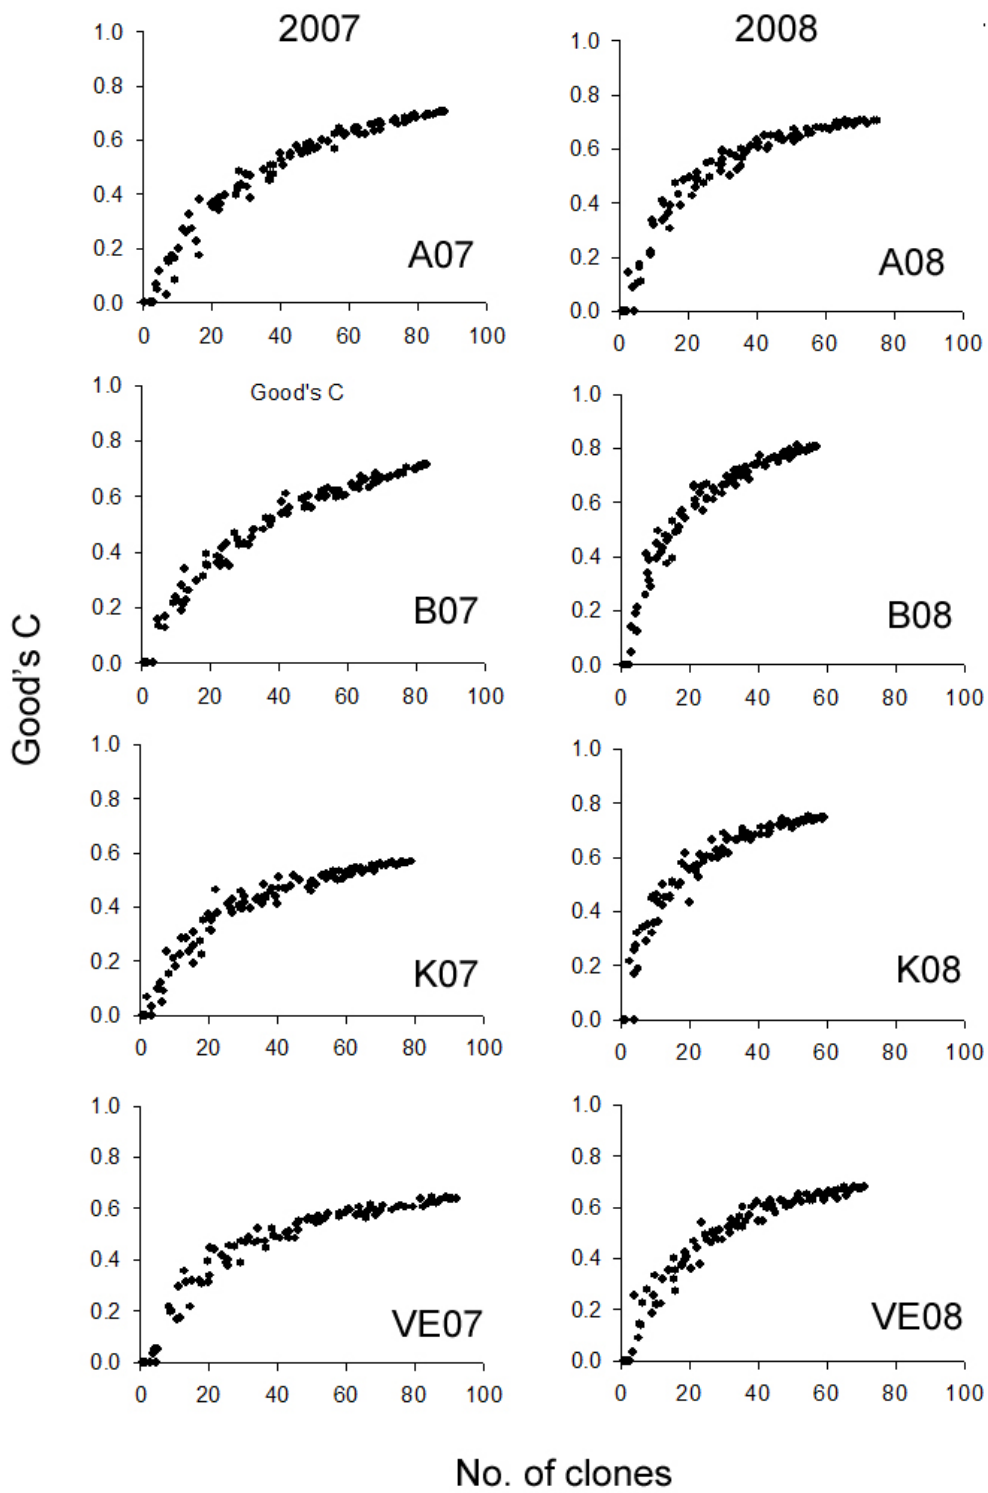

**Fig. S1B.**

**Fig. S1.** Archaeal (A) and bacterial (B) clone library coverage based on Good's C estimator from the water column of Lake Marathonas, Greece.

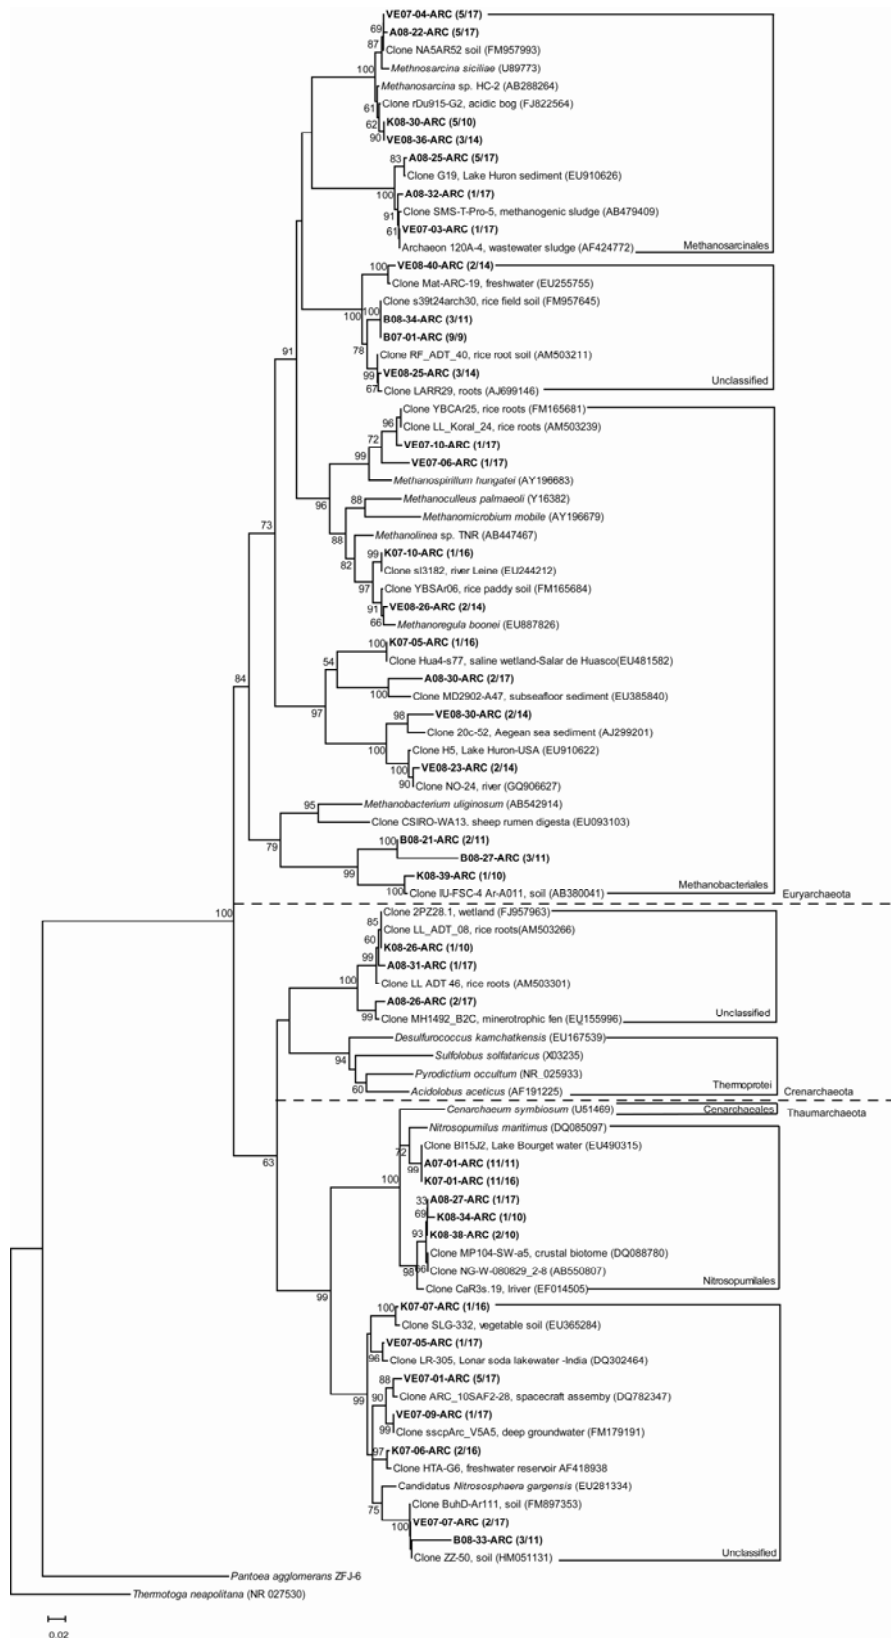

**Fig. S2.** Phylogenetic tree of the PCR-amplified archaeal 16S rRNA gene phylotypes (in bold) (ca. 570 bp) in the water column of Marathonas Reservoir, Greece, based on the neighbour-joining method as determined by distance using Kimura's two-parameter correction. Numbers of identical ( $\geq 98\%$  sequence similarity) phylotypes of the total number phylotypes found in each station are shown in parentheses. One thousand bootstrap analyses (distance) were conducted, and percentages  $\geq 50\%$  are indicated at nodes. Numbers in brackets are GenBank accession numbers. Scale bar represents 2% estimated distance.

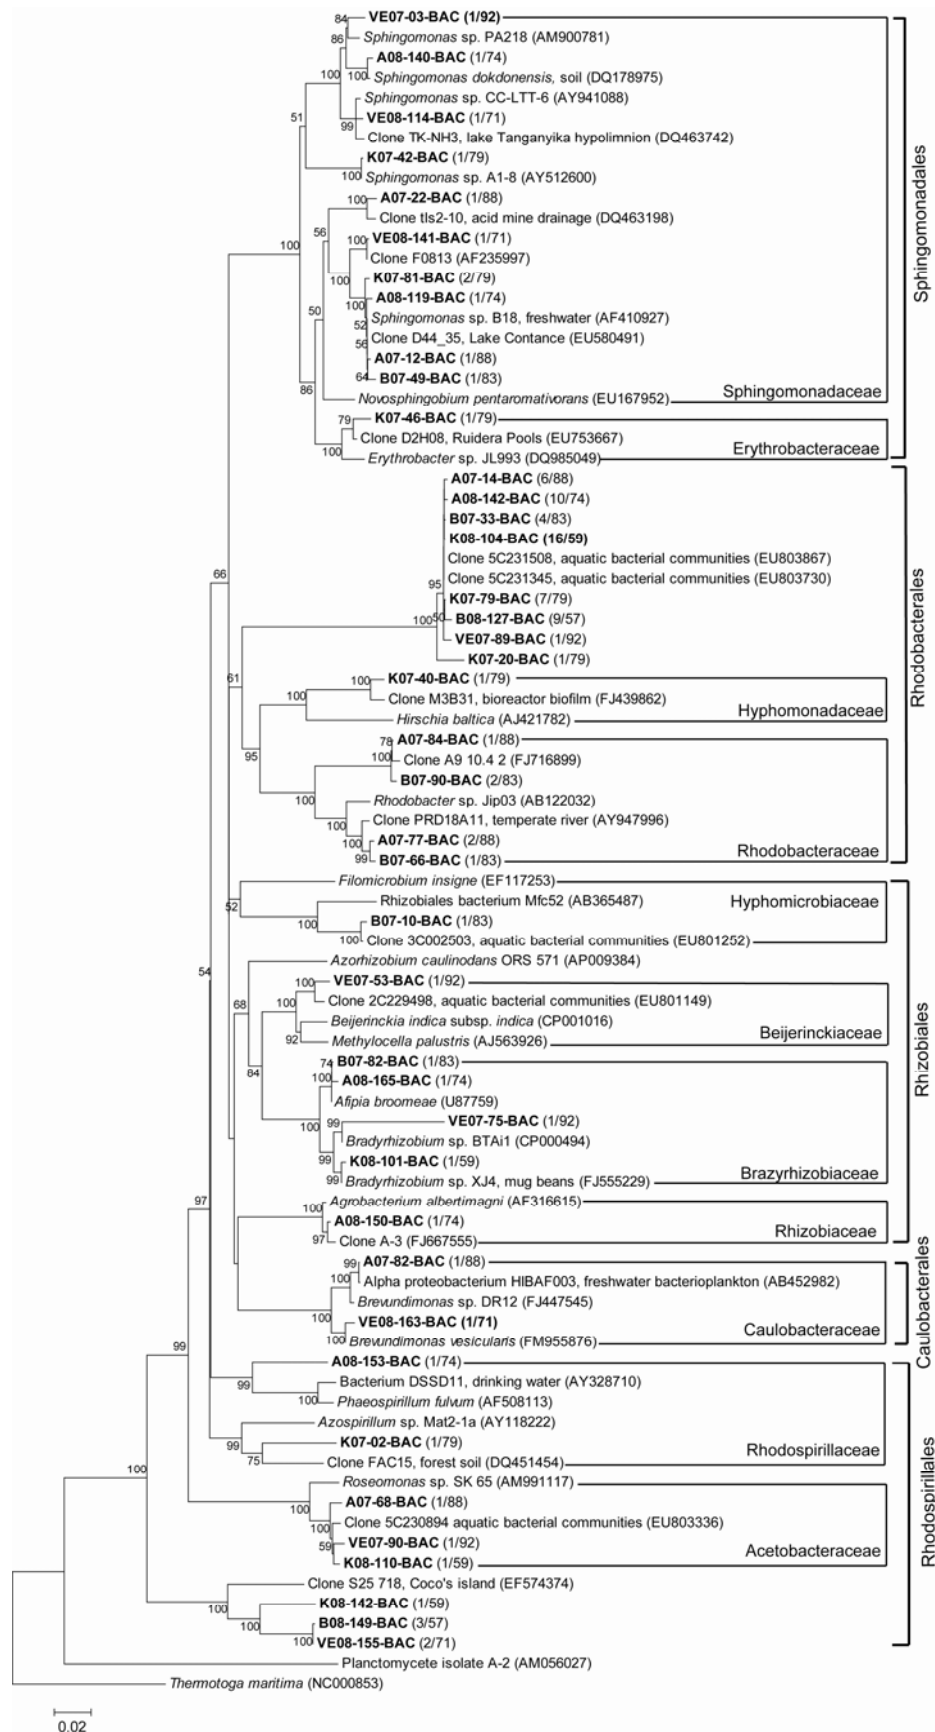

**Fig. S3.** Phylogenetic tree of the PCR-amplified 16S rRNA gene phylotypes (in bold) (ca. 1390 bp) of the Alphaproteobacteria in the water column of Marathonas Reservoir, Greece, based on the neighbour-joining method as determined by distance using Kimura's two-parameter correction. Numbers of identical ( $\geq 98\%$  sequence similarity) phylotypes of the total number phylotypes found in each station are shown in parentheses. One thousand bootstrap analyses (distance) were conducted, and percentages  $\geq 50\%$  are indicated at nodes. Numbers in brackets are GenBank accession numbers. Scale bar represents 2% estimated distance.

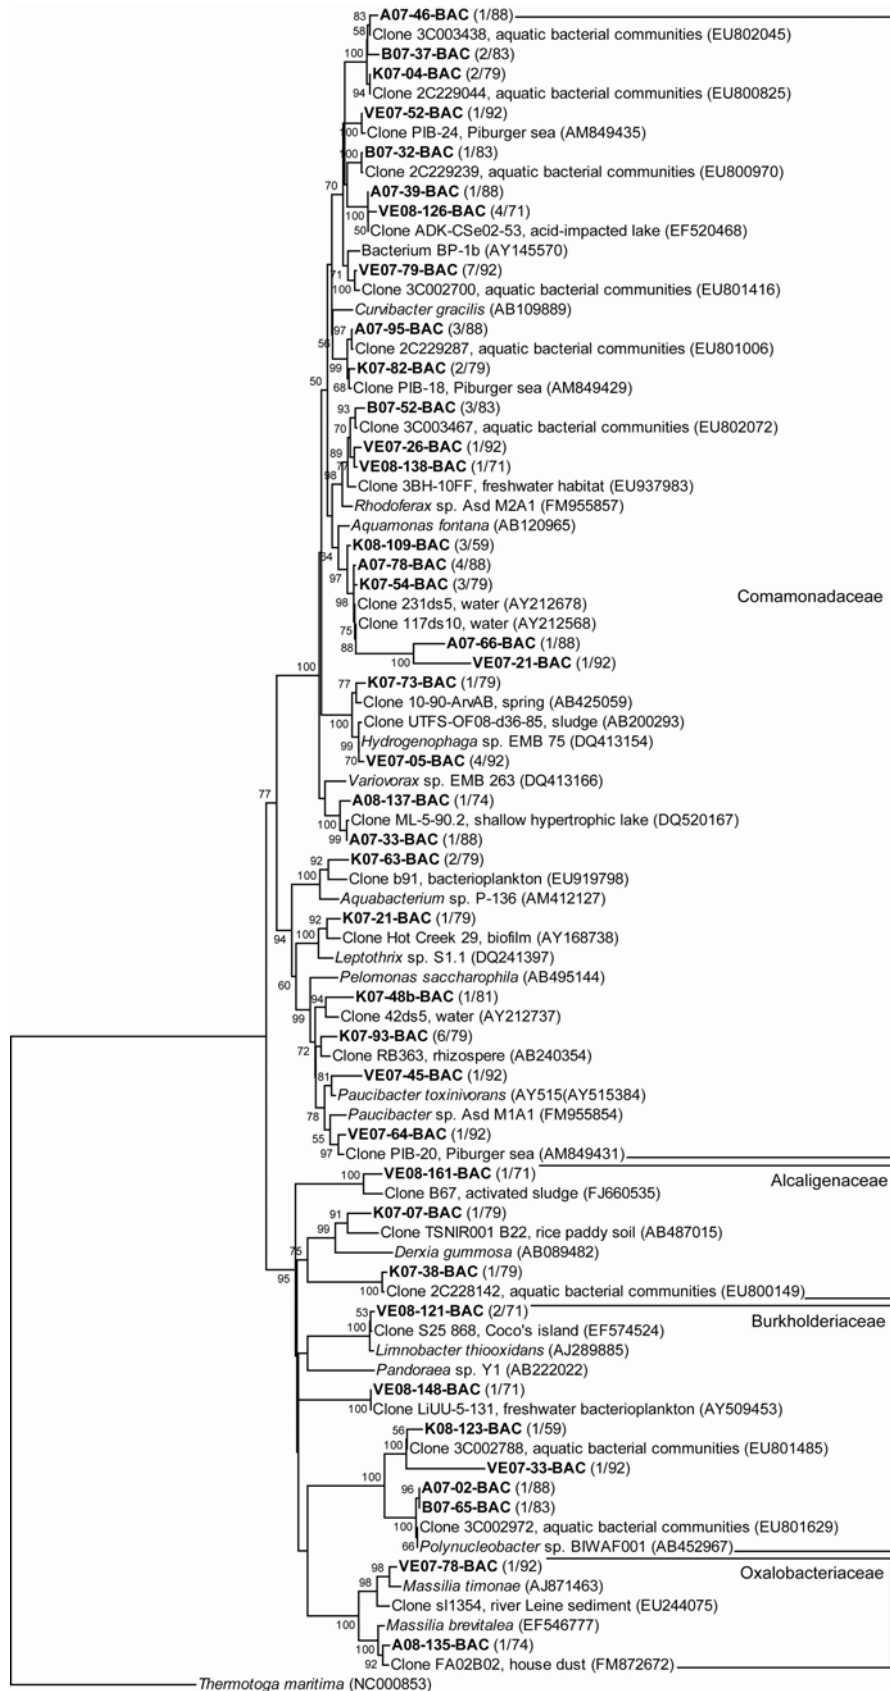

**Fig. S4.** Phylogenetic tree of the PCR-amplified 16S rRNA gene phylotypes (in bold) (ca. 1390 bp) of the rest of the order Burkholderiales (Betaproteobacteria) in the water column of Marathonas Reservoir, Greece, based on the neighbour-joining method as determined by distance using Kimura's two-parameter correction. Numbers of identical ( $\geq 98\%$  sequence similarity) phylotypes of the total number phylotypes found in each station are shown in parentheses. One thousand bootstrap analyses (distance) were conducted, and percentages  $\geq 50\%$  are indicated at nodes. Numbers in brackets are GenBank accession numbers. Scale bar represents 2% estimated distance.

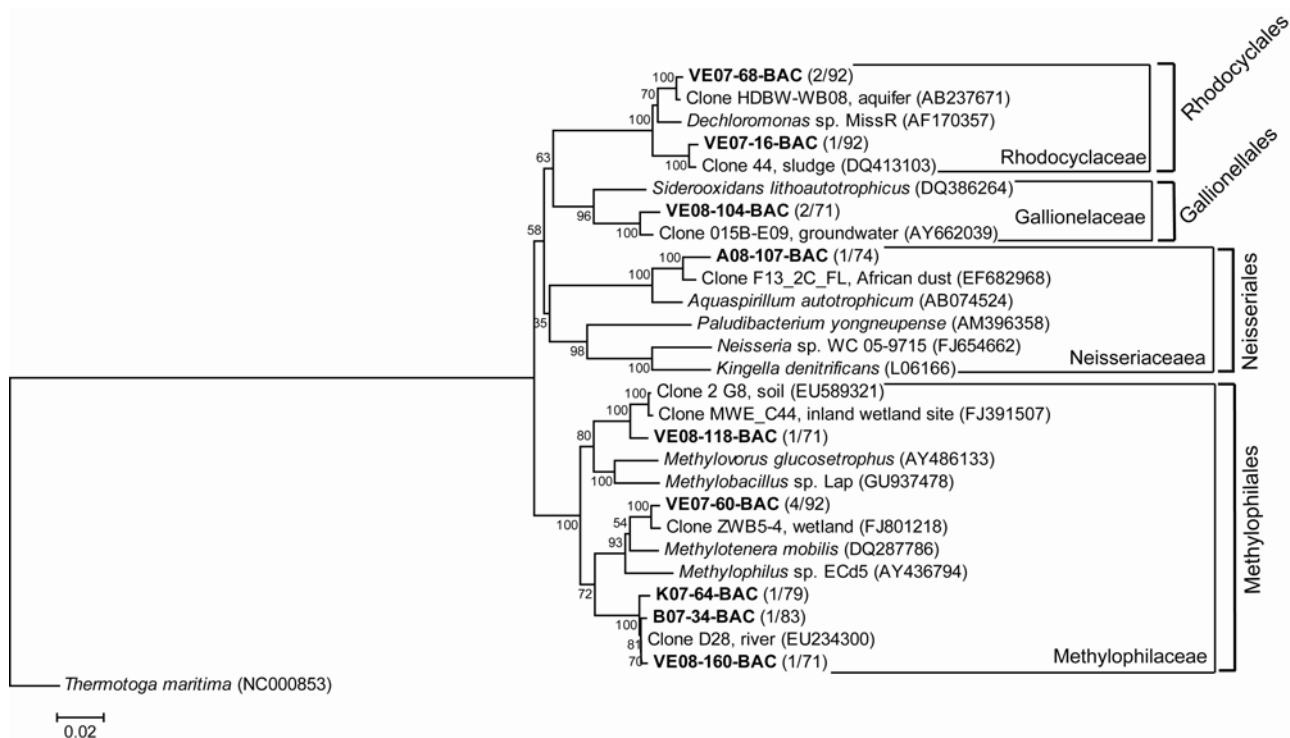

**Fig. S5.** Phylogenetic tree of the PCR-amplified 16S rRNA gene phylotypes (in bold) (ca. 1390 bp) of the rest of the Betaproteobacteria in the water column of Marathonas Reservoir, Greece, based on the neighbour-joining method as determined by distance using Kimura's two-parameter correction. Numbers of identical ( $\geq 98\%$  sequence similarity) phylotypes of the total number phylotypes found in each station are shown in parentheses. One thousand bootstrap analyses (distance) were conducted, and percentages  $\geq 50\%$  are indicated at nodes. Numbers in brackets are GenBank accession numbers. Scale bar represents 2% estimated distance.

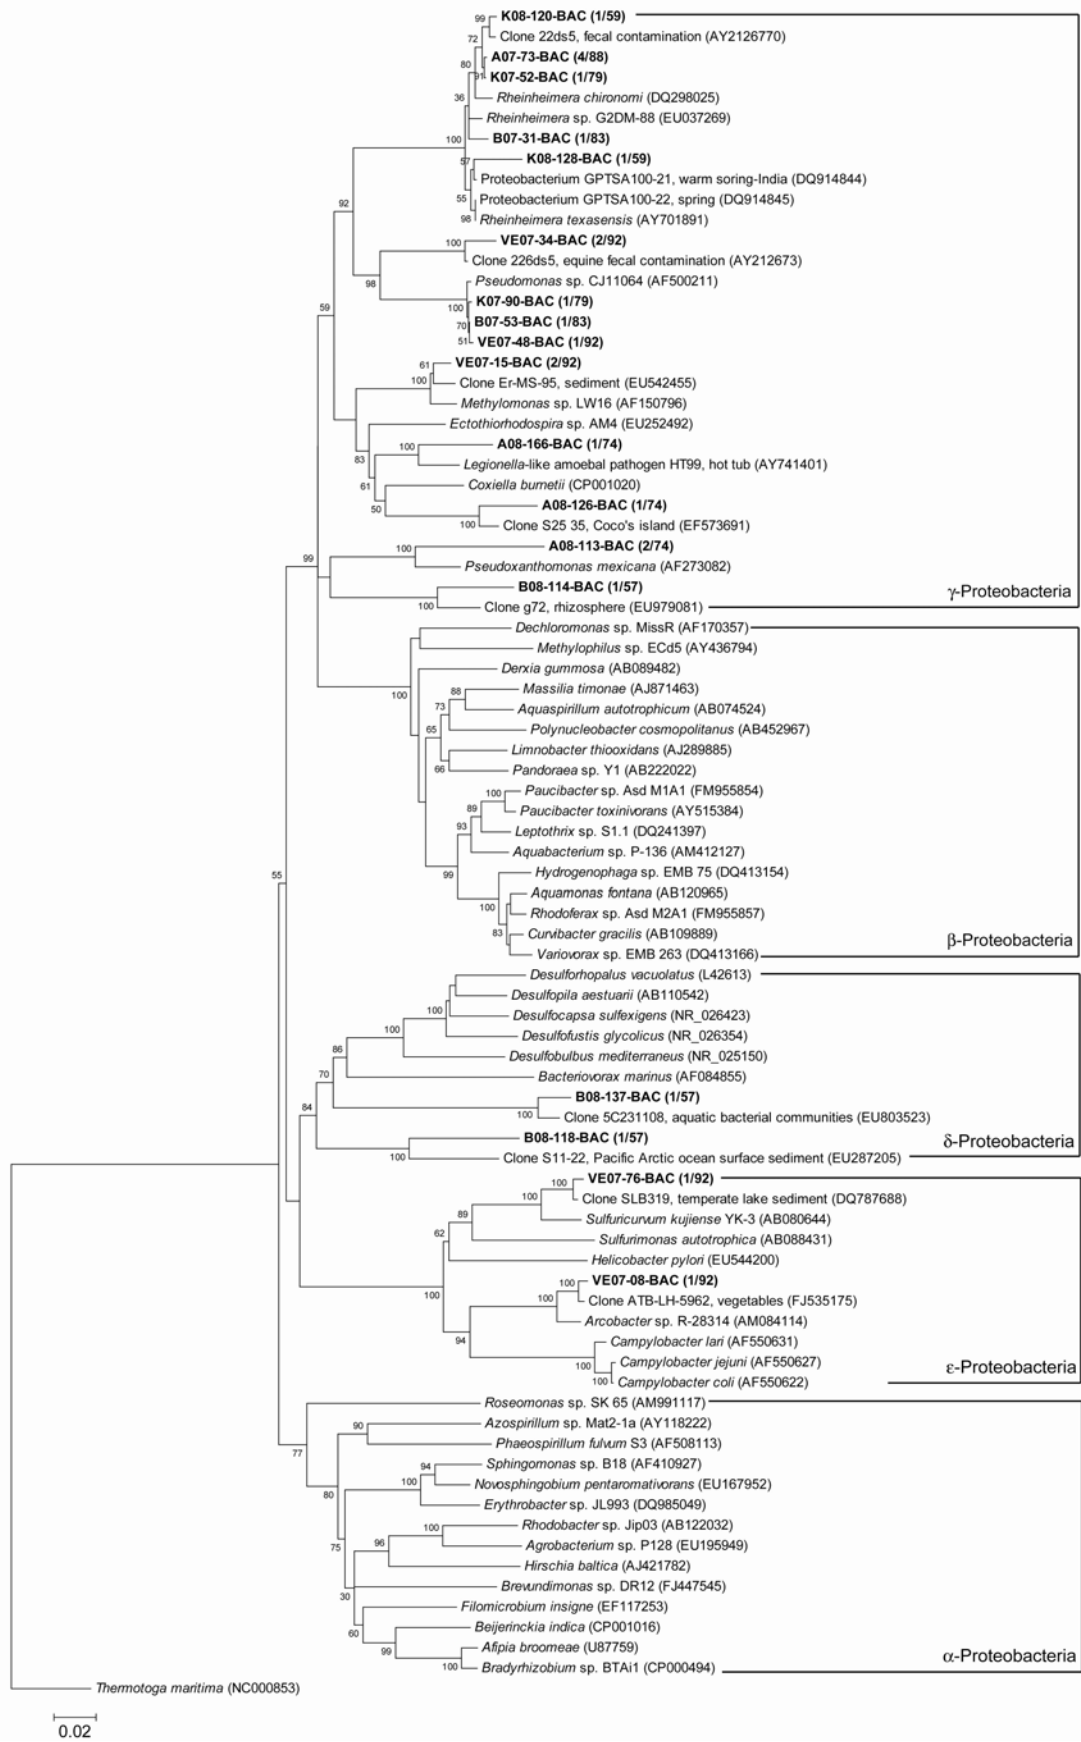

**Fig. S6.** Phylogenetic tree of the PCR-amplified 16S rRNA gene phylotypes (in bold) (ca. 1390 bp) of  $\alpha$ -,  $\gamma$ -,  $\delta$ - and Epsilonproteobacteria in the water column of Marathonas Reservoir, Greece, based on the neighbour-joining method as determined by distance using Kimura's two-parameter correction. Numbers of identical ( $\geq 98\%$  sequence similarity) phylotypes of the total number phylotypes found in each station are shown in parentheses. One thousand bootstrap analyses (distance) were conducted, and percentages  $\geq 50\%$  are indicated at nodes. Numbers in brackets are GenBank accession numbers. Scale bar represents 2% estimated distance.



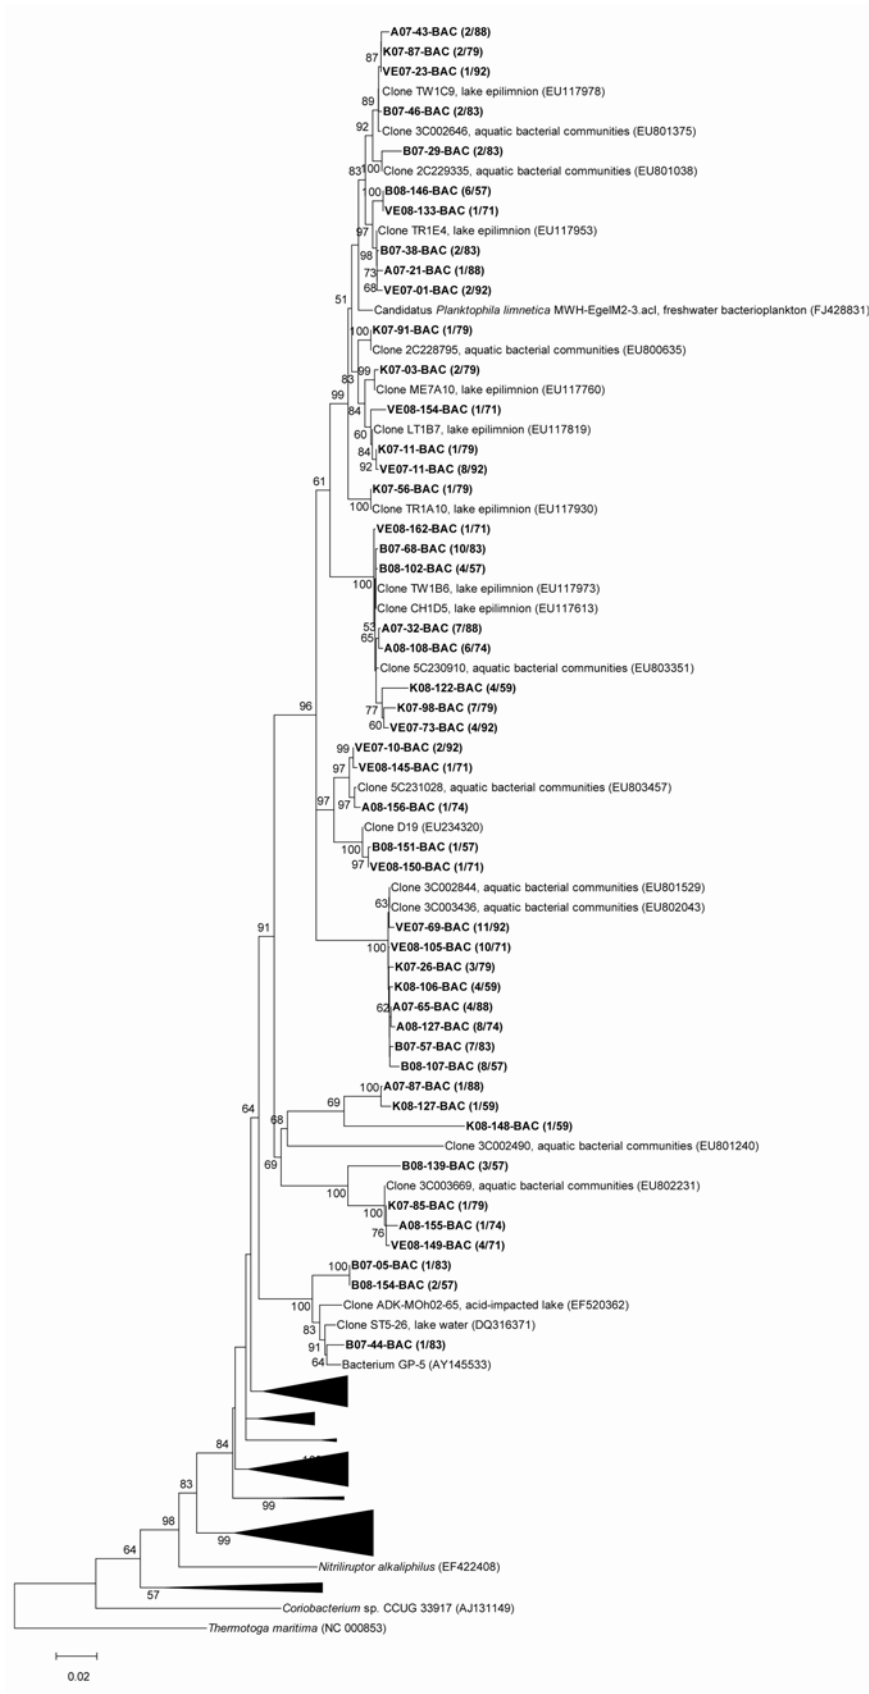

**Fig. S7B.**

**Fig. S7.** Phylogenetic tree of the PCR-amplified 16S rRNA gene phylotypes (in bold) (ca. 1390 bp) of Actinobacteria in the water column of Marathonas Reservoir, Greece, based on the neighbour-joining method as determined by distance using Kimura's two-parameter correction. Numbers of identical ( $\geq 98\%$  sequence similarity) phylotypes of the total number phylotypes found in each station are shown in parentheses. One thousand bootstrap analyses (distance) were conducted, and percentages  $\geq 50\%$  are indicated at nodes. Numbers in brackets are GenBank accession numbers. Scale bar represents 2% estimated distance.



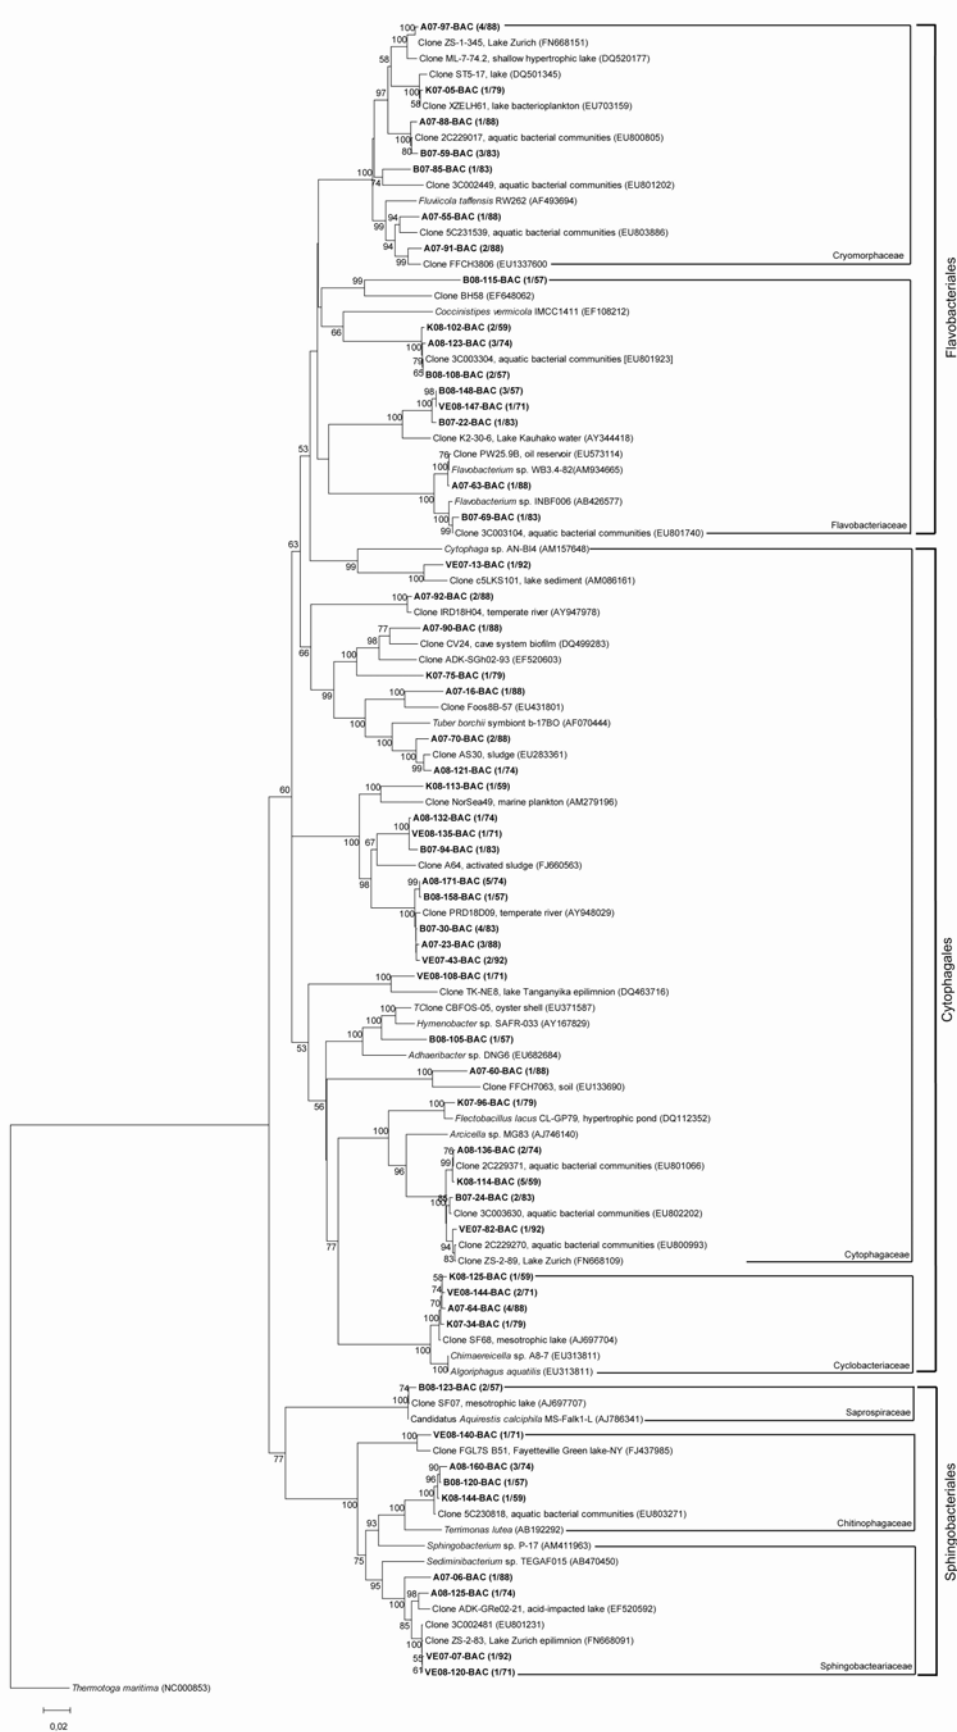

**Fig. S8.** Phylogenetic tree of the PCR-amplified 16S rRNA gene phylotypes (in bold) (ca. 1390 bp) of Bacteroidetes in the water column of Marathonas Reservoir, Greece, based on the neighbour-joining method as determined by distance using Kimura's two-parameter correction. Numbers of identical ( $\geq 98\%$  sequence similarity) phylotypes of the total number phylotypes found in each station are shown in parentheses. One thousand bootstrap analyses (distance) were conducted, and percentages  $\geq 50\%$  are indicated at nodes. Numbers in brackets are GenBank accession numbers. Scale bar represents 2% estimated distance.

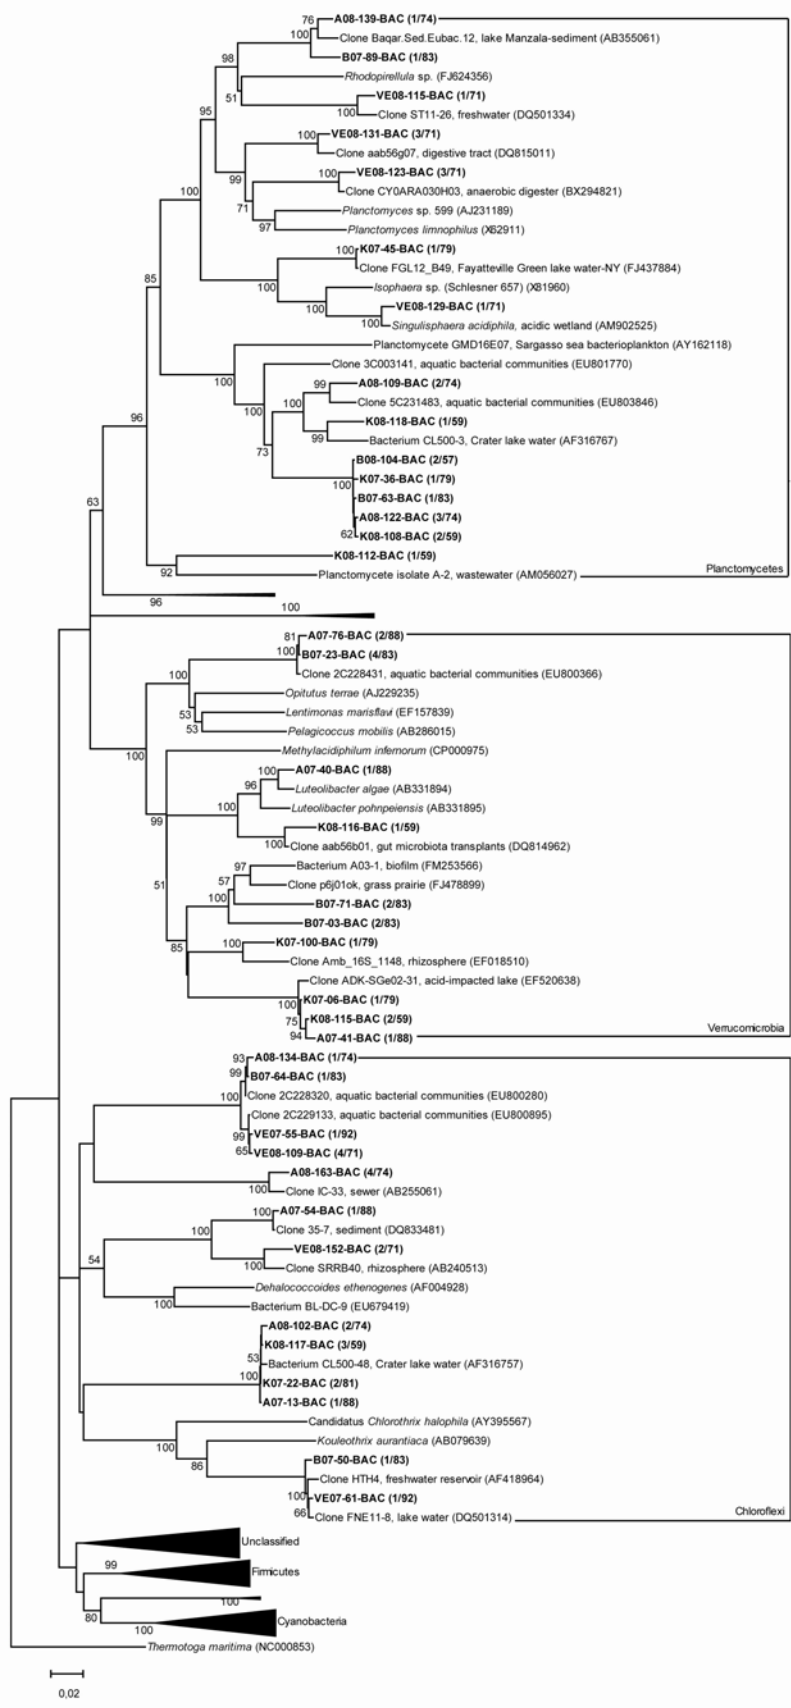

**Fig. S9.** Phylogenetic tree of the PCR-amplified 16S rRNA gene phylotypes (in bold) (ca. 1390 bp) of Planctomycetes, Verrucomicrobia and Chloroflexi in the water column of Marathonas Reservoir, Greece, based on the neighbour-joining method as determined by distance using Kimura's two-parameter correction. Numbers of identical ( $\geq 98\%$  sequence similarity) phylotypes of the total number phylotypes found in each station are shown in parentheses. One thousand bootstrap analyses (distance) were conducted, and percentages  $\geq 50\%$  are indicated at nodes. Numbers in brackets are GenBank accession numbers. Scale bar represents 2% estimated distance.

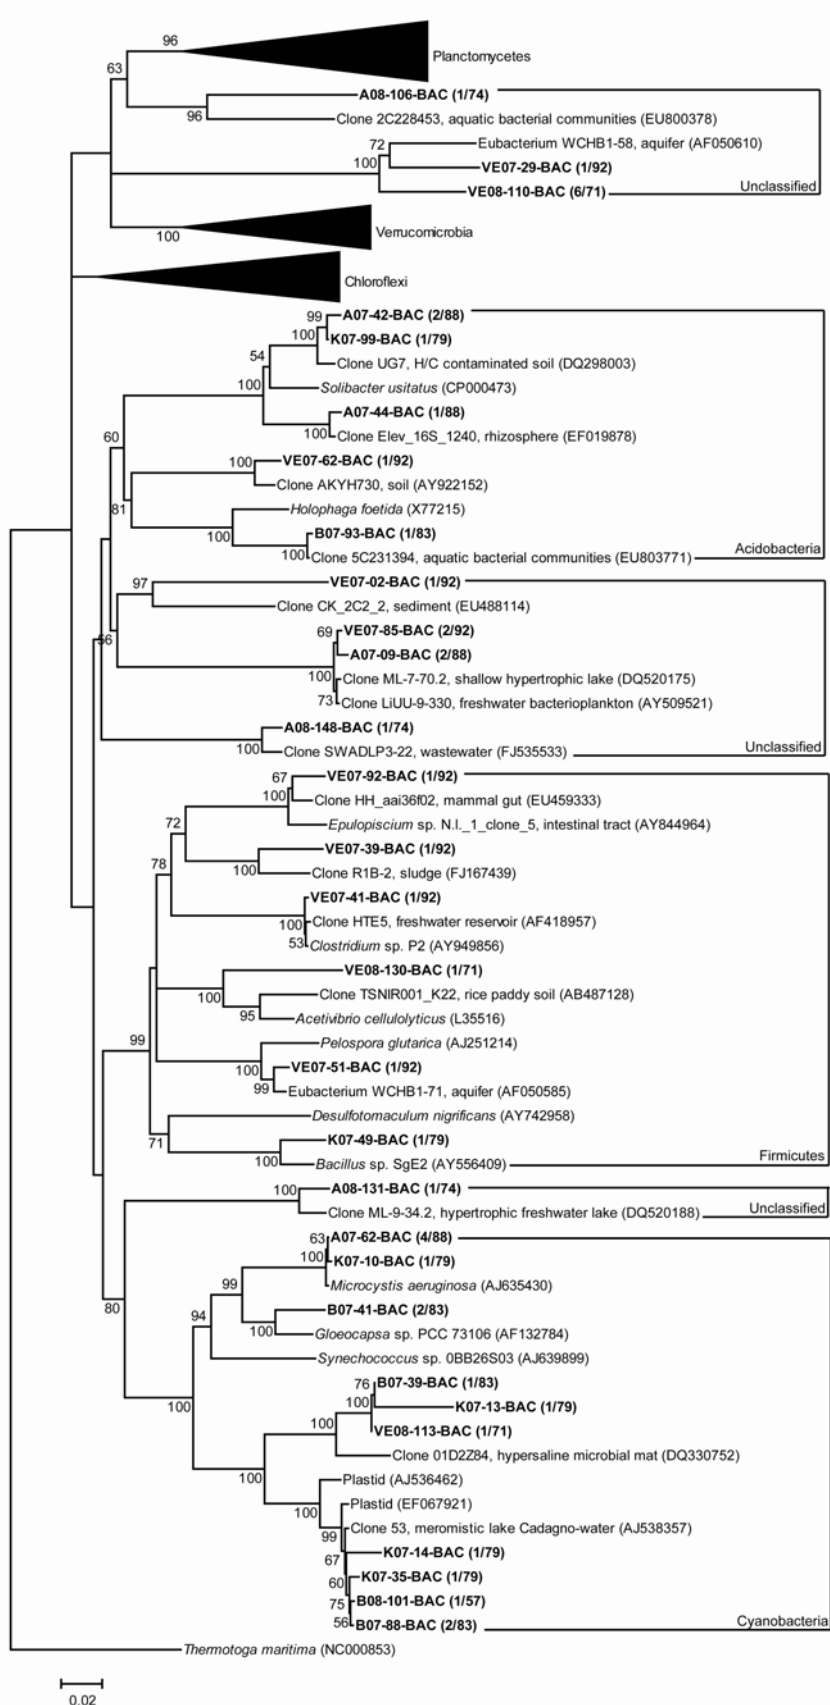

**Fig. S10.** Phylogenetic tree of the PCR-amplified 16S rRNA gene phylotypes (in bold) (ca. 1390 bp) of Acidobacteria, Firmicutes and Cyanobacteria in the water column of Marathonas Reservoir, Greece, based on the neighbour-joining method as determined by distance using Kimura's two-parameter correction. Numbers of identical ( $\geq 98\%$  sequence similarity) phylotypes of the total number phylotypes found in each station are shown in parentheses. One thousand bootstrap analyses (distance) were conducted, and percentages  $\geq 50\%$  are indicated at nodes. Numbers in brackets are GenBank accession numbers. Scale bar represents 2% estimated distance.
